# Supplementary material for: Promiscuous terpene synthases from Prunella vulgaris highlight the importance of substrate and compartment switching in terpene synthase evolution
Source: PubMed Central journal article supplement (PMC6593445; doi:10.1111/nph.15778), 2019-04-08
Supplement: NPH-223-323-s001.pdf [file NPH-223-323-s001.pdf]

## **New *Phytologist* Supporting Information**

Article title: Promiscuous terpene synthases from *Prunella vulgaris* highlight the importance of substrate and compartment switching in terpene synthase evolution

Authors: Sean R. Johnson, Wajid Waheed Bhat, Radin Sadre, Garret P. Miller, Alekzander Sky Garcia, Björn Hamberger

Article acceptance date: 22 February 2019

The following Supporting Information is available for this article:

**Method S1** Nanopore sequencing and assembly

**Table S1** Synthetic oligonucleotides used in this study

**Fig. S1** Stereo view of homology models for each enzyme characterized in this study

**Fig. S2** Multiple sequence alignment of cytosolic and plastidial TPS-a enzymes found in Lamiaceae, Euphorbiaceae, Solanaceae, and Brassicaceae

**Fig. S3** GC-MS of hexane extracts TPS activity assays in vitro, in *E. coli*, and in *N. benthamiana*

**Fig. S4** Mass spectra of enzyme products and selected reference spectra

**Fig. S5** Peak q only appears when PvTPS4 or PvTPS5 is co-expressed with FPPS in *N. benthaminana*

**Fig. S6** NMR spectra of PvHVS major product from GGPP, identified as 11-hydroxy vulgarisane.

**Fig. S7** UHPLC/MS of 11-Hydroxyvulgarisane in *P. vulgaris*

**Table S2** Exact masses and relative abundance for ions of vulgarisin-related compounds detected by UHPLC/MS in *P. vulgaris* root extracts

**Fig. S8** UHPLC/MS of vulgarisin A and D isomers in *P. vulgaris*

## **Methods S1. Nanopore sequencing and assembly.**

RNA was extracted from root tissue according to a previously described method (Hamberger *et al.*, 2011), mRNA was selected from 16 µg total RNA using Dynabeads Oligo (dT)25 (ThermoFisher Scientific) yielding 119 ng mRNA. The mRNA was converted to cDNA using the Oxford Nanopore cDNA-PCR Sequencing Kit (SQK-PCS108) and sequenced on the Gridlon. The resulting library consisted of 2,146,282 reads with an average length of 735 bp, and an N50 of 817 bp. The Illumina reads were from PhytoMetSyn were cleaned and normalized using Bbnorm ([sourceforge.net/projects/bbmap/](https://sourceforge.net/projects/bbmap/)), and the raw reads were subjected to error correction using LoRDEC (Salmela & Rivals, 2014) according to settings suggested for transcriptome data (Hoang *et al.*, 2017). A hybrid assembly using the corrected Nanopore reads and the Illumina reads was generated using IDP-denovo (Fu *et al.*, 2018). The resulting assembly seemed to be of much worse quality than the Illumina-only assembly and we did not pursue further analysis.

**Table S1. Synthetic oligonucleotides used in this study.** Lower case letters indicate vector overhangs to enable In-Fusion (Takara) cloning.

| <b>Name</b>                     | <b>Sequence</b>                                 |
|---------------------------------|-------------------------------------------------|
| PvTPS2 F                        | GATGAGCTCTCTCACAAATCTCTACAG                     |
| PvTPS2 R                        | TGAAGAATCAAACCTTGATATGGATTGAGC                  |
| PvHVS F                         | CTCAAAATGAGCTCTCTCTCAATTCCC                     |
| PvHVS R                         | GTCTGAATGGGGAGTCAAATATG                         |
| PvTPS4 F                        | ATGGGTGAAGAGAGCAGTGTAAG                         |
| PvTPS4 R                        | CAAGGGAATCAAATGAGAAGAGG                         |
| PvTPS5 F                        | GAAATGGCAGCTGCAGGC                              |
| PvTPS5 R                        | TCAGATGACAAGAGGATTGAGTAGGAG                     |
| PvTPS2 pEAQ Infusion F          | ttctgccccaaattcgCGAATGAGCTCTCTCACAAATCTCTA      |
| PvTPS2 pEAQ Infusion R          | agttaaaggcctcgaTCAAACCTTGATATGGATTGAGCAGC       |
| PvHVS pEAQ Infusion F           | ttctgccccaaattcgCGAATGAGCTCTCTCTCAATTCCCTT      |
| PvHVS pEAQ Infusion R           | agttaaaggcctcgaTCAAATATGTATAGGATTCATCAATAGAGCAG |
| PvTPS4 pEAQ-TP Infusion F       | ggcgggaagagttaacATGGGTGAAGAGAGCAGTGTA           |
| PvTPS4 pEAQ-TP Infusion R       | agttaaaggcctcgaTCAAATGAGAAGAGGATTAAGAAACAAAGC   |
| PvTPS5 pEAQ-TP Infusion F       | ggcgggaagagttaacATGGCAGCTGCAGGCATTG             |
| PvTPS5 pEAQ-TP Infusion R       | agttaaaggcctcgaTCAGATGACAAGAGGATTGAGTAGG        |
| AtRuBisCO small pEAQ Infusion F | ttctgccccaaattcgATGGCTTCCTCTATGCTCTCTTC         |
| AtRuBisCO small pEAQ Infusion R | agttaaaggcctcgaGTTAACTCTTCCGCCGTTGC             |
| pET28plus PvTPS2 Infusion F     | gaaggagatataccatgTCAGCTGTGATGGTGGATCATGC        |
| pET28plus PvTPS2 Infusion R     | ggtggtggtggtgctcgaAACTTGATATGGATTGAGCAGC        |
| pET28plus PvHVS Infusion F      | gaaggagatataccatgTCAGCTGTGATGGTGGAAAGG          |
| pET28plus PvHVS Infusion R      | ggtggtggtggtgctcgaAAATATGTATAGGATTCATCAATAGAGC  |
| pET28plus PvTPS4 Infusion F     | gaaggagatataccATGGGTGAAGAGAGCAGTGTAAGT          |
| pET28plus PvTPS4 Infusion R     | ggtggtggtggtgctcgaAAATGAGAAGAGGATTAAG           |
| pET28plus PvTPS5 Infusion F     | gaaggagatataccATGGCAGCTGCAGGCATTG               |
| pET28plus PvTPS5 Infusion R     | ggtggtggtggtgctcgaAGATGACAAGAGGATTGAGTAGG       |
| zFPPS pEAQ-HT F                 | ttctgccccaaattcgATGAGTTCTTTGGTTCTTCAATGTTG      |
| zFPPS pEAQ-HT R                 | agttaaaggcctcgaTCAATATGTGTGTCCACCAAAAACG        |
| NNPPS pEAQ-HT Infusion F        | ttctgccccaaattcgATGAACTCTTCAATAGTGTCTCAACAC     |
| NNPPS pEAQ-HT Infusion R        | agttaaaggcctcgaTCAATATGTGTGTCCACCAAAAAC         |
| NNPPS F                         | ATGAACTCTTCAATAGTGTCTCAAC                       |
| NNPPS R                         | TCAATATGTGTGTCCACCAAAAACG                       |
| NNPPS pACYCDuet Infusion F      | aaggagatatacatATGTCTGATCGTGGACTCAGC             |
| NNPPS pACYCDuet Infusion R      | cttaccagactcgagTCAATATGTGTGTCCACCAAAAAC         |
| pEAQ_PvTPS2_GFP_For             | attctgccccaaattcgATGAGCTCTCTCACAAATCTCT         |
| pEAQ_PvTPS2_GFP_Rev             | ctagtcataccggtcgcAACTTGATATGGATTGAGCAG          |
| pEAQ_PvHVS_GFP_For              | attctgccccaaattcgATGAGCTCTCTCTCAATTCC           |

|                     |                                          |
|---------------------|------------------------------------------|
| pEAQ_PvHVS_GFP_Rev  | ctagtcataccggtcgcAATATGTATAGGATTCATCAATA |
| pEAQ_PvTPS4_GFP_For | attctgcccaaattcgATGGGTGAAGAGAGCAGT       |
| pEAQ_PvTPS4_GFP_Rev | ctagtcataccggtcgcAATGAGAAGAGGATTAAGAAAC  |
| pEAQ_PvTPS5_GFP_For | attctgcccaaattcgATGGCAGCTGCAGGCATT       |
| pEAQ_PvTPS5_GFP_Rev | ctagtcataccggtcgcGATGACAAGAGGATTGAGT     |

**Fig. S1. Stereo view of homology models for each enzyme characterized in this study.** Select positions are highlighted in red. PvHVS: blue; PvTPS2: cyan; PvTPS4: yellow; PvTPS5: tan.

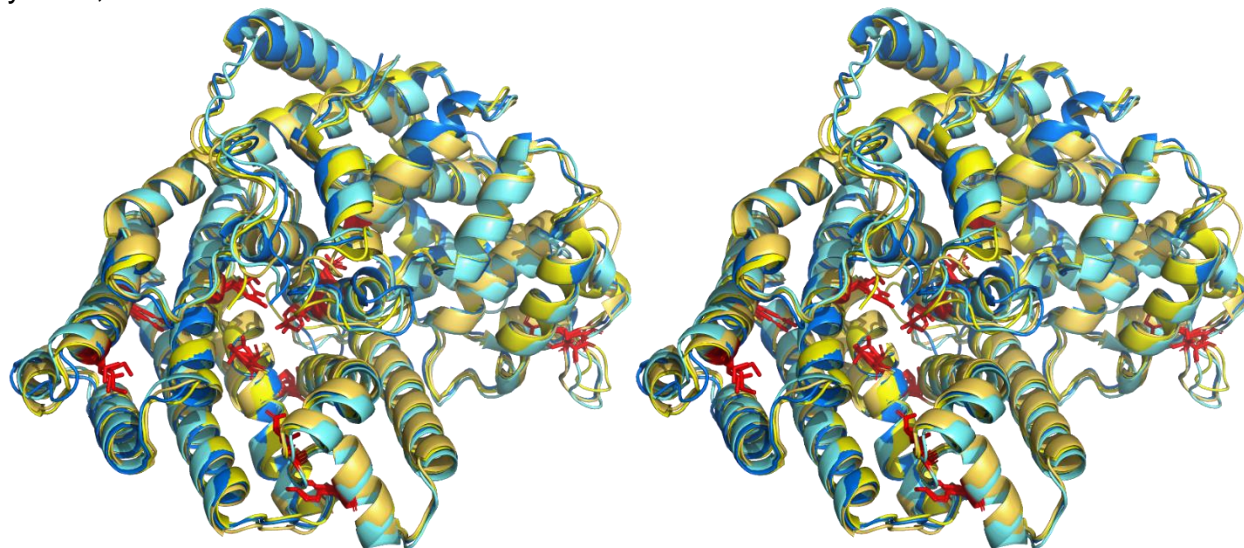

**Fig. S2. Multiple sequence alignment of cytosolic and plastidial TPS-a enzymes found in Lamiaceae, Euphorbiaceae, Solanaceae, and Brassicaceae.** Cytosolic and plastidial enzymes are above and below the central line, respectively, and enzymes from *P. vulgaris* characterized in this study are within the central box. Column highlights are explained in the main text. Accession numbers and families are indicated in the first line of the alignment. Abbreviations: RcAFS, *Ricinus communis* alpha-farnesene synthase; NtEAS, *Nicotiana tabacum* epi-aristolochene synthase; SlGDS, *Solanum lycopersicum* germacrene D synthase; AtTPS21/20, *Arabidopsis thaliana* terpene synthase 21/20; PvTPS2/4/5, *P. vulgaris* terpene synthase 2/4/5; PvHVS, *P. vulgaris* hydroxy vulgarisane synthase; RcCAS3, *Ricinus communis* casbene synthase; RcCAS2, *Ricinus communis* neocembrene synthase; NsCBTS3, *Nicotiana sylvestris* cembratrienol synthase 3.

|                |         |                                                               |     |                        |
|----------------|---------|---------------------------------------------------------------|-----|------------------------|
| AEQ27768.1     | RcAFS   | -----MKVGPVLCQCQTN-----                                       | 14  | ← Euphorbiaceae        |
| 5eau           | NtEAS   | -----                                                         | 0   | ← Solanaceae           |
| XP_019070211.1 | SlGDS   | -----MV-----VGF                                               | 5   | ← Solanaceae           |
| AAO85539.1     | AtTPS21 | -----                                                         | 0   | ← Brassicaceae         |
| AZB50512.1     | PvTPS4  | -----MG-                                                      | 2   | ← Lamiaceae            |
| AZB50513.1     | PvTPS5  | -----MAA-AG-----IVS                                           | 8   | ← Lamiaceae Cytosolic  |
| AZB50511.1     | PvHVS   | MSSLSIPFSSAICTSSIPKISTGHHRR-----ARMPAHDTSRLV-FRPSAV-----MVE   | 49  | ← Lamiaceae Plastidial |
| AZB50510.1     | PvTPS2  | MSSLTNLYSSIMTISTTKKVAVAHRLRTFNHGHRTRRRTRRLV-FRPSAV-----MVD    | 54  | ← Lamiaceae            |
| XM_002513297   | RcCAS3  | MALPPVAM-----QSNSEKLEK-----YFFYRLPSTRLEYGNRRFH-FLPSSA-----KP- | 43  | ← Euphorbiaceae        |
| XM_002513288   | RcCAS2  | MALQSLFL-----QANSQNRNF-----CQFLSMPS--IRCCSCRVP-FSSWSA-----KS- | 43  | ← Euphorbiaceae        |
| ADI87448.1     | NsCBTS3 | -----MS-----QSI-SPLIC-----SHFAKFSQNIWRNCSQLR-VIHSSY-----ASF   | 38  | ← Solanaceae           |
| AOA178U9Y5.1   | AtTPS20 | MEA-----ITK-----NGSLSQLTVLHCGPKLSLSSIPVRCRLRFKSNPF            | 38  | ← Brassicaceae         |
|                | RcAFS   | -----EAFGMMQERRSGNYK-PNIWKYDFLQSLSSKYDE-EKYKTAERLKE           | 59  |                        |
|                | NtEAS   | -----MASAAVANYEEEEIVRPVADFS-PSLWGDQFLSFSIDNQVA-EKYAKEIEALKE   | 51  |                        |
|                | SlGDS   | GGEAE-----ITRRCANHH-PSVWGDHFLTYANLLGAN-EWEEKEHEDQKG           | 49  |                        |
|                | AtTPS21 | -----MGSEVNRPLADFP-ANIWEDPLTSFSSKSDLGT-ETFKEKHSTLKE           | 43  |                        |
|                | PvTPS4  | -----ESSVSCLRNSRPPVTDYV-PSIWADTFSTSSFKEQEQ-QKYEEAIEELKK       | 51  |                        |
|                | PvTPS5  | -----AAVPTNIRQLRPPILKYK-PSMWDGTFATFSLDHQLQ-EKYSKEIETLKK       | 56  |                        |
|                | PvHVS   | G-----SPMTTSSNGKEVQRLLITTFK-PSMWDGTFSTFSDNQVQ-EKYLKEIEELKK    | 100 |                        |
|                | PvTPS2  | H-----AT-----EVRQVKTPYDPVSMWGMNFSTFSLDHQLQ-QKYSEIEELKK        | 98  |                        |
|                | RcCAS3  | ---HAKPPAQACLSSTTHQEVRLAHFP-PTVWGNRFASLTFNPSEF-ESYDGRVNVLKE   | 98  |                        |
|                | RcCAS2  | ---VTNKSPQACLSSTKQQEFRPLANFP-PTVWGSFASPTFSESEF-GTYDRQANVLQK   | 98  |                        |
|                | NsCBTS3 | GGRRKERVRRMNRAMDLSSSSRHLADFP-STIWGDHFLSYNSEITEITTQEKNEHELKE   | 97  |                        |
|                | AtTPS20 | PKKLVVTRARTSINSDEHAANRPLFQFP-PSLDDRFSLISANQSEI-DSLGRDIEALKA   | 96  |                        |
|                | RcAFS   | DAKHLFIEA-VDLQKLELVDCI I KVLASHFKDEIKKALDTIASSI--KNDKSDAIKNR  | 116 |                        |
|                | NtEAS   | QTRNMLLATGMKLADTLNLDITIERLGISYHFEKEIDDILDQIYNQN--S-----NCNDL  | 104 |                        |
|                | SlGDS   | GVRKMLVLSPSKSLQKLELINTIQLLGVSYHFEHEIEESLSEIYNGY--E-EWIGESHDL  | 106 |                        |
|                | AtTPS21 | AVKEAFMSSKANPIENIKFIDALCRLGVSCHEFKDIVEQLDKSFDCLDFPQMVROEGCDL  | 103 |                        |
|                | PvTPS4  | EARCILLTAAASPRKQMLIDTLERLGLAYHFETEIEHILQQINQ-----QTLQDYDL     | 104 |                        |
|                | PvTPS5  | EVKSMLMAA--TSTQLMVLIDKLERLGLSYHFEAEIEDKQVYDL----EEEVADHDL     | 109 |                        |
|                | PvHVS   | EVRSTLMSA--THRKLFDLIDNLERMGIAYHFETEIEDKQAHASL---EEE-DDYDL     | 153 |                        |
|                | PvTPS2  | NVRSTLMAA--TSTRLLMFIDNLERLGLAYHFETEIEDKQVYDLSL---EKEGEDNDL    | 152 |                        |
|                | RcCAS3  | KVKDLLVSSATDSVETVVLIDLLCRLGVSYHFENDIEELLSKIFNSQ--PDLVDEKECDL  | 156 |                        |
|                | RcCAS2  | KIRELLTSSRSDSVEKIAFIDLCLLGVSYHFENDIEEQLSQIFSCQ--PGLLDEKQYDL   | 156 |                        |
|                | NsCBTS3 | IVRKMLVETLDNSTQKVLIDTIQRLGLAYHFENDEIENSIQNIYFYS--QNSDNDENHL   | 155 |                        |
|                | AtTPS20 | KVSEKLVCM--DVKERIHLIHLVSLGVAYHFQIEEFLKVDENV--E-DMNLGEEDM      | 151 |                        |
|                | RcAFS   | YVTALCFRLLRQHGYEVSQDVFSDFLDENGTFLKA---KSMVKGVLLEFEASYLALESE   | 173 |                        |
|                | NtEAS   | CTSAIQFRLLRQHGFINISPEIFSKFDENGKFKES---LASDVLGLLNLYEASHVRTHAD  | 161 |                        |
|                | SlGDS   | HDVALSFRLLRQGGYVSSDVFRKFTDERGNYKET---LASDVQGLLSLYEAAQLRVDD    | 163 |                        |
|                | AtTPS21 | YTVGIIQVFRQFGFKLSADVFEKFKDENGKFKGH---LVTDAYGMLSLYEAAQWGTGHE   | 160 |                        |
|                | PvTPS4  | FTTTLGFRLLRQHRHVSVCVDFDKFLDQDAKFKESLL--LSSDTESVLSLYDAAHVFRHE  | 163 |                        |
|                | PvTPS5  | FTTALRFRLLRQHGYHVSVDVDFKFKDQKDWLEIISLSRDDIEGVLSLYEAAHVRIRE    | 169 |                        |
|                | PvHVS   | FTTALRFRLLRQHRYHVSVDVDFKFKDQKDKES---LSSDVEGLLSLFEASHLRIHNE    | 210 |                        |
|                | PvTPS2  | FTTALRFRLLRQHRYQVSCDVFQYFEEGKRVKES---HCSVDVEGLLSLYEAAVVGIPNE  | 209 |                        |
|                | RcCAS3  | YTAALVFRVFRQHGFKMSSDVFSKFKDSGKFKES---LRGDARGMLSLFEASHLSVHGE   | 213 |                        |
|                | RcCAS2  | YTVALVFRVFRQHGFKMSSNVFHKFTDSDHGKFKAS---LLSDARGMLSLFEASHLSMHGE | 213 |                        |
|                | NsCBTS3 | YVAALRFRLLRQGGYQNMSSDVFKQFTNHDGKFKEN---HTNDVQGLLSLYEAAHMRVHDE | 212 |                        |
|                | AtTPS20 | YSISVIFRVRFRYRHLKSSDVFNRFKEENGDFKCC---LDDVRGMLSFYEASYFGTNT    | 208 |                        |

RcAF5 NILDDAKAFSTTILKDISA--TTESNLYKQVVHALELPPHWRVWFDFVKWHIK-TFQKDK 231  
NtEAS DILEDALAFSTIHLESAAP--HLKSPLREQVTHALEQCLHKGVPRVETRFIFISSIYDKEQ 219  
SlGDS ILDEAINFTTHLKLPL--NLSDPATQVSNALKFFINNIIVRVATRKYIS-FYQEDK 220  
AtTPS21 DIIDEALAFSRSHLEEISS--RSSPHLAIRIKNALKHPYHKGISRIETROYISYEEES 218  
PvTPS4 NLLKEAAVSTKQYLRLGIEAE--LLDSSLKEKVNRAKHPHLDVPIFYARFFIS-IYEKDL 221  
PvTPS5 KVLDEAAFTIHRKHLVLPQ-LESA-IKEKVELALQHPHKSPLPLNFRSYIN-IYEGEG 226

---

PvHVS DVLDEAIVFTTHLNRMMPO-LESP-LKEEVKHALRYPLHKCLGILSLRFHID-RYENDK 267  
PvTPS2 KILDEAMTITTRQLTLMPLR-LESTILKEKVEHGLKFPVQRTNITFSLRYVE-IYENDE 267  
RcCAS3 DILEEAFATKDYLOQSSAVE--LFPNLKRHTNALEQPFHSGVPRLEARKFIDLYEADIE 271  
RcCAS2 DILEEAFATKDYLESSAVDQYLCPNLQKHITNALEQPFHKGIPRLEARKYIDLYEGD-E 272  
NsCBTS3 EILEEALIFTTHLESVIP--NLSNSLKVQVTEALSHPIRKTIIPRVGARKYIY-IYENIG 269  
AtTPS20 EILDEAMGFTRKHLELFVGG-SNEEHLSGHIKNVLYLSQQENAIVVMSREYIQ-FYEQET 266

RcAF5 SINKTLLDLAKVNFVQATLQNDLKEISRWRNGLIENLK-FSRDRLVESFLCTVGLV 290  
NtEAS SKNNVLRFAKLDNFNLQMLHKQELAQVSRWKKDLDFVTTLP-YARDRVVECYFWALGVY 278  
SlGDS SHNEMLLHFAKLDNFNLQRLHKRELCDITRWKKDSEIAQALP-FARDRVVELYFWSLGVY 279  
AtTPS21 C-DPTLLEFAKIDFNLLQILHREELACVTRWHHEMFKSKVT-YTRHRIETAYLWSLGT 276  
PvTPS4 SRNELLAKLNFNFQNLKYKEELFQLTGWNKFDVKSCLT-YARDRLVEAYLWGVAYH 280  
PvTPS5 LTNESVVKLSKFNFNFLQNIYRKELBELTSWNNKYELSKLP-YARDRLVECYIWGAALR 285  
PvHVS SRDEVVLRGQVNFNYMNIYMNELYEITTWNNKLMQTSKVP-YFRDRLVECYMWGLAYH 326  
PvTPS2 SRDALVLRKALNFNFQNIYRSELSEATAWNNYENLASEVP-YIRDRMVECYVSGVTYR 326  
RcCAS3 CRNETLLEFAKLDYNRVQLLHQELCQFSKWKDLNLASDIP-YARDRMAEIFFWAVAMY 330  
RcCAS2 CRNETVLEFAKLDYNRVQLLHQELSQFSQFSTWKKDLNLASEIP-YARDRMAEIFFWAVAMY 331  
NsCBTS3 THNDLLKFAKLDNFNLQKHLKELNELTSWKKDLDCANKEP-YAKDRLVEAYFWTVGIY 328  
AtTPS20 HHDETLLKFAKINFKFMQLHYVQELQITVKKWKELDLESKIPNYRVRVAVCELYWAMAVY 326

RcAF5 FEPQYSSFRWLTKVIMILVIDDVYDIYGSLEELQHTNAINRWDTALEQ--LP-EYM 347  
NtEAS FEPQYSQARVMLVKTISMISIVDDTFDAYGTVKELEAYTDAIQRWDINEIDR--LP-DYM 335  
SlGDS FEPHYSVARKILTKVLCFCSIMDDTYDTYGTLDLTLTAAIERWDIDASEQ--LP-SYM 336  
AtTPS21 FEPQYSQARVITMALILFTALDDMYDAYGTMELELELFTDAMDEWLPVVPDEIPIP-DSM 335  
PvTPS4 YEPQYVNRIGLVKGIQITGIMDDTYDNYATLNEAQIFQTLDRWNANEVDG--LP-DYM 337  
PvTPS5 YEPQFAYLRAIVAKTMQVLSIMDDTYDNYGTLEEDDLTDLLEKWNLEIDV--LP-DFM 342  
PvHVS FEPEYAPVRVILITKYMTATTVDVDDTYDNYATLEIELELFTQAI DRWSEDEIDQ--LPDEYL 384  
PvTPS2 FEPQYSQIRMMVTKYVILGSLVDDTYDYATPOEIDLMTQAMESWNTQETEK--LP-EYL 383  
RcCAS3 FEPDYAHTRIIAKVVLISLIDDTIDAYATMEETHILAEAVARWDMSCLEK--LP-DYM 387  
RcCAS2 FEPKYAQARMIIAKVVLISLVDVDFDAYATIEETHLLEAFERWDKSCLDQ--LP-DYM 388  
NsCBTS3 FEPQYSRSRSMITKVVKMNSIIDDTYDAYATFDELVLFTDAIQRWDEGAMDS--LP-TYL 385  
AtTPS20 MEPQYSVARIILSKSLVLTWITIDDLVYDAYCTLPEAIAFTENMERWETDAKDM---P-DHM 382

RcAF5 KICFKTLHTITGETAHEMQREKRWQEQETHLKKVWADFQALFVEAKWFNKGYTPSVQ 407  
NtEAS KISYKAILDLKDYEKELSSAGR---SHIVCHAIERMKEVVRNRYNVSTWFIEGYTPPV 392  
SlGDS KLSYRALVQVNETEKELENLGNKM-TYRVKYSINEMKLLRAYFQEAkWYHGKDVPTME 395  
AtTPS21 KFIYNVTVVEFYDKLDEELEKEGR---SGCGFHLKKSLOKTANGYMQEAkWLLKDYIATFD 392  
PvTPS4 KIVYDFILSIYEDYKCSASKHEK---GFSVPYFKEAVQELSSAYNQLEWVTERNMPSFI 394  
PvTPS5 KIVYRFIMSVYEDFEREAEOQK---SFAAPYSESLEKLSRAVYKQKQWIMERKMPFFE 399  
PvHVS KIVYKGLMNFTEEFRRDAEERGG---GYVVPYFIEETKRATQGYANEQRWIMKREMPSE 441  
PvTPS2 KLVLKAFMRFTTEFACEAEKQK---SYVVPYVIEQMKVEVGRRYAEAQEWTRAQESPTFO 440  
RcCAS3 KVIYKLLNTESEFEKELTAEKG---SYSVKYGREAFQELVIRGYYLEAVWRDEGKIPSF 444  
RcCAS2 KVIYKLLNTESEFENDLAKEG---SYSVRYGREAFQELVIRGYYLEAMWRDEGKIPSF 445  
NsCBTS3 RSIYQGLLDVFNEMEEVLAKEG---ADRIYAKKEMKLVAAVYFKEAQWLNANYIPKCE 442  
AtTPS20 KLMRSFIDLHEDFKREVILEGR---LYSVEYIGDECKRLFPREDLKLKSWARTGYIPNDY 439

RcAF5 EYLKTACISSGSLLSVHSFFLIMNEGTRMLHFLEKNOE-MFYNISLIIRLCNDLGTSV 466  
NtEAS EYLSNALATTTYYLATTSYLGMKS-ATEQDFEWSKNPK-ILEASVICRVIDDTATYE 450  
SlGDS QYIKNGIPSSYLLLATTSWLGMDVATKDAFDWISNET-ILVASSIARLLNDLVTHE 454  
AtTPS21 EYKENAILSSCYGLIAMTFVRMTDVAKLDAFEWLNHPK-IRVASEIISRTDDISSYE 451  
PvTPS4 EYARNSEITSSLYMMFAVIPGLKS-LTPPETIDWVKTEPL-ITVSTAMIGRYMDDIGSQH 452  
PvTPS5 EYMTNSVFTSCYIPMFIAFVPGMKS-VTEKEVQWLLSEPK-IVISTAKMGRFTLEDLGSHE 457  
PvHVS EYMNRSRVTSIMYVTVYVAVVAVIES-ATKETVDWALSDD-IFVYTNDIGRLIDDLATHR 499  
PvTPS2 EYLANGRVTVLHYVLFPIIATFTKA-ATEETIHLLDDSSKLVTVSADINRLDLDLATHQ 499  
RcCAS3 DYLYNGSMTTGLPLVSTASFMGVQEITGLNEFQWLETNPK-LSYASGAFIRLVNDLTSV 503  
RcCAS2 EYIRNGSLSSGLPLVSTASFMGVQEITGIREFQWLRTPK-LNHFSGAVGRIMNDIMSHV 504  
NsCBTS3 EYMKNGVVTSTGTMYGIISLVVMEIITKEAFEWLANEPL-ILRAASTICRLMDDMADHE 501  
AtTPS20 EYMEVGIVTAGIDMTVAFAFIGMGE-AGKEAFDWIRSRPK-FIQTLDIKGRLRDDVATYK 497

RcAF5 AEQERGAASSIVCHMREMEVLEEEARSYLKGIIGNYKVKVNEKCFQSP--EMQLFINI 524  
NtEAS VEKSRGQIATGIECCMRDYDISTKEAMAKFQNMABETAWKDINEGLLRPT--VSTFELTP 508  
SlGDS IEVERGDVASGIECYMNEYGATKEEAYMEIRKIIENNWKDLNRCGLKPTT--VPRVLLMP 512  
AtTPS21 FEHKREHVATGIDCYMQQFGVSKERAVEVMGNIVSDAWKDLNQEMLRPHV--FPFPLLMR 509  
PvTPS4 RESKGGVLTAVDCYMKQYVNSKEETLSKFGELVEDAWEDLNKEWVETTS-FLPTEIAVQ 511  
PvTPS5 ENRDGEMETVDDCYMKDKGVSKQRTIYEFQVLENGWKVDYTAEWAKENS--VCKEMVEH 515  
PvHVS RERKDGIMLTSMDYMKYEGGTMEEGEAAFRKLMEEKWLLNAAWVDTINGKESKEIVVQ 559  
PvTPS2 RESKNGVLTTPMDYMKYEGVSRQEAIEVTKLQETWKEINAWEVWVCKT--VPKEICND 557  
RcCAS3 TEQQRGHVASCIDCYMNQHGVSKEAVKILQKMATDCKWKEINEECMRRSQ--VSVGHLMR 561  
RcCAS2 SEQNRGHVASCIDCYMKQYVESKEEAIKEMQKMASDAWKDINEGYMRPAQ--VSVSELMR 562  
NsCBTS3 VEQQREHVASFVECYMEEYGVSKQEAIVEMRKKITNACKDINKELLRFTA--VPMFLER 559  
AtTPS20 DEMARGEIATGINDCYMKQYKVTBEEAFLEFHRRRIKHTSKLVNEEYFKTTV---PLKLVRI 554

|         |                                                          |     |
|---------|----------------------------------------------------------|-----|
| RcAF5   | NVNMARVVHNLV-QN-RDGFVQDQHNKKQILSLLVHFFKLD-----           | 564 |
| NtEAS   | ILNLRARIVEVTYIHN-LDGYTHPEKVLKPHIINLLVDSIKI-----          | 548 |
| SlGDS   | VLNLRVAEF-FYKD-EDAYTFSKNNLKDVISMVLIDFIKA-----            | 551 |
| AtTPS21 | VLNLSRVLDV-FYRY-QDAYTNPV-LLKEHIVSLLIETIPI-----           | 547 |
| PvTPS4  | FLNYARMCDACYNNSNDGDGYTDPVIFK-SNVVALFLNPLLI-----          | 551 |
| PvTPS5  | LLNYGRVIAEITYNNK-EDGYTEPEKYLGLAAALLLNPLVI-----           | 555 |
| PvHVS   | VLDLARICTLYGDE-EDGFTYPEKNFAPLVAALLMNPVHI-----            | 599 |
| PvTPS2  | LVEISRLSEIYYKSG-EDCYTNPEKNLAPIMAAVLLNPFYQV-----          | 597 |
| RcCAS3  | IVNLRARLTDV-SYKY-GDGYTDSQ-QLKQFVKGLFVDFISI-----          | 599 |
| RcCAS2  | VVNLRARLTDV-SYKY-GDGYTDPQ-HLKQFVKGLFIDFVPLPNQIRKGETKTKHV | 614 |
| NsCBTS3 | TLNFIKRLVGT-FLKD-DDGYTNPKSQVKDSIALLFVESIDI-----          | 598 |
| AtTPS20 | AFNVGRAIDTNY-KH-GDGLTYGG-IVEGQITSLFLDLITI-----           | 592 |



**Fig. S3. GC-MS of hexane extracts TPS activity assays *in vitro*, in *E. coli*, and in *N. benthamiana*.** *In vitro*, purified enzymes were fed with pure precursors. For the *N. benthamiana* assays, DXS is overexpressed in all conditions. Chromatograms labeled *P. vulgaris* root are from methyl tert-butyl ether extracts of fresh root. Key shows the feature annotations. Annotations in black are based on comparisons to the Adams or NIST17 libraries. Annotations in blue are based on comparisons to authentic standards, or NMR of the purified compound.

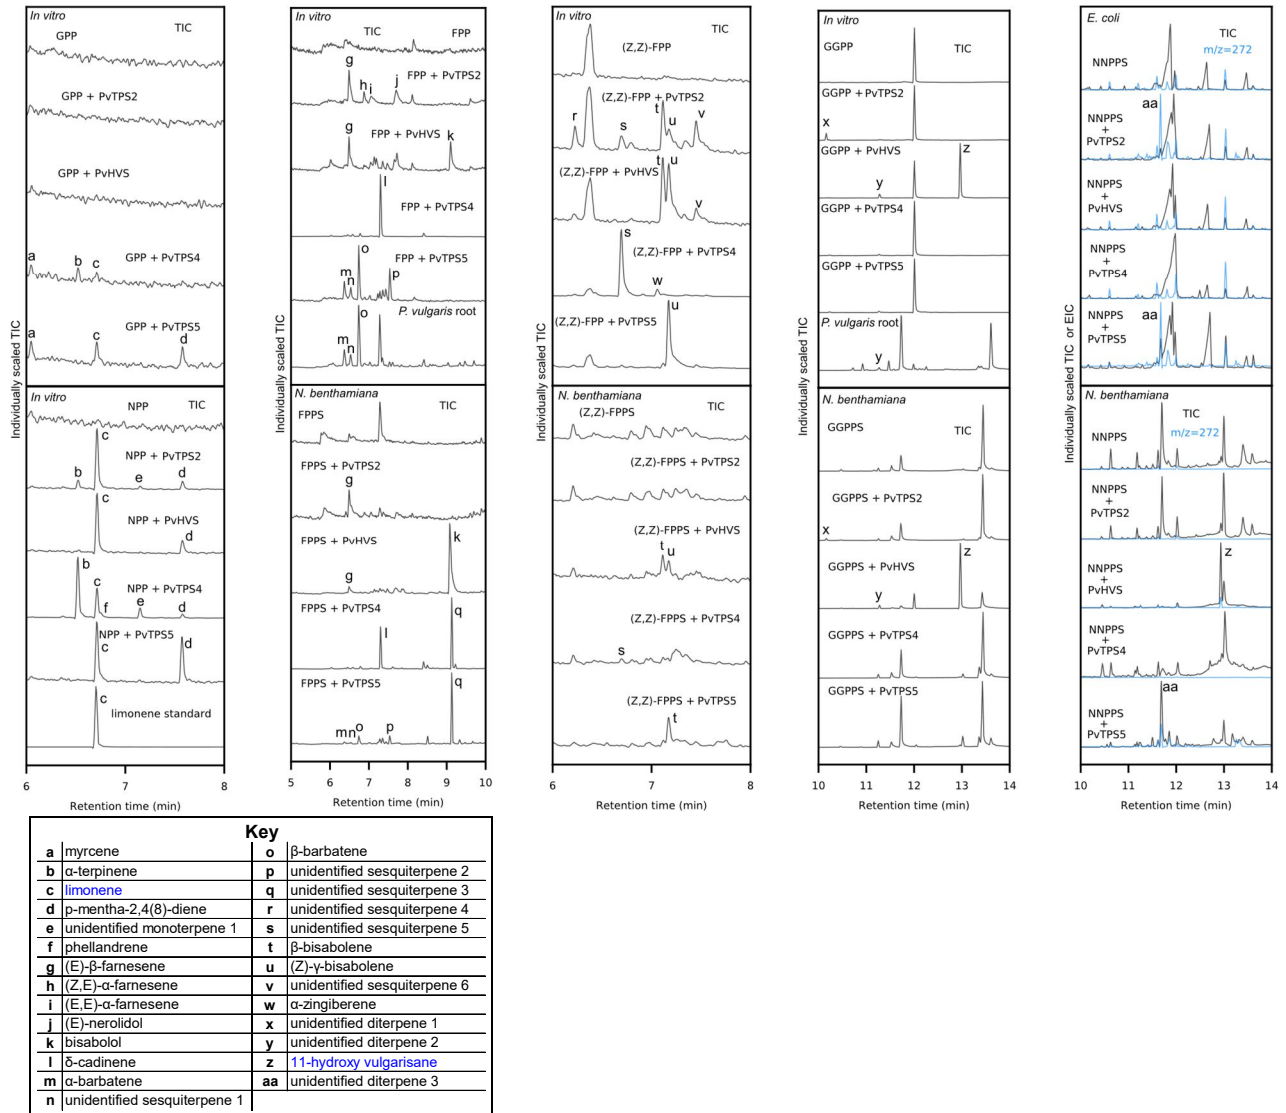

**Fig. S4. Mass spectra of enzyme products and selected reference spectra.**

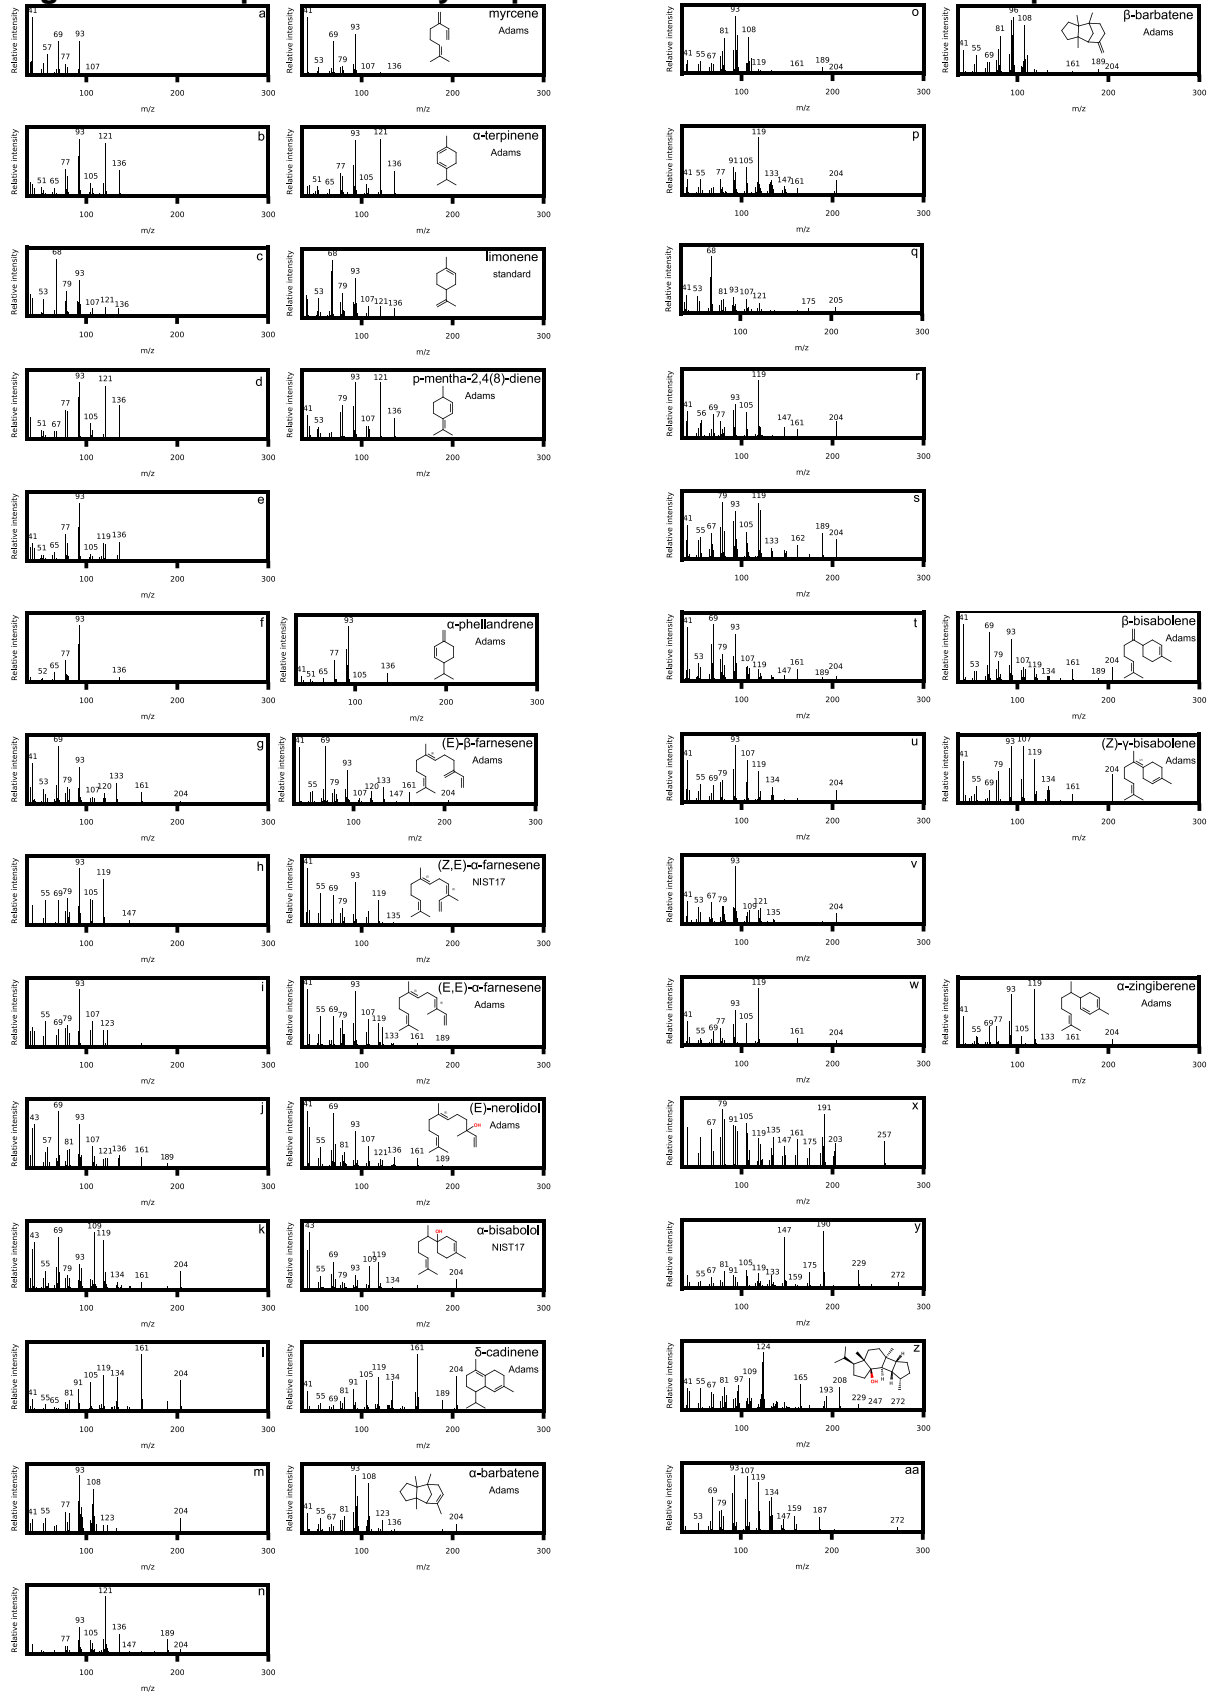

**Fig. S5. Peak q only appears when PvTPS4 or PvTPS5 is co-expressed with FPPS in *N. benthamiana*.**

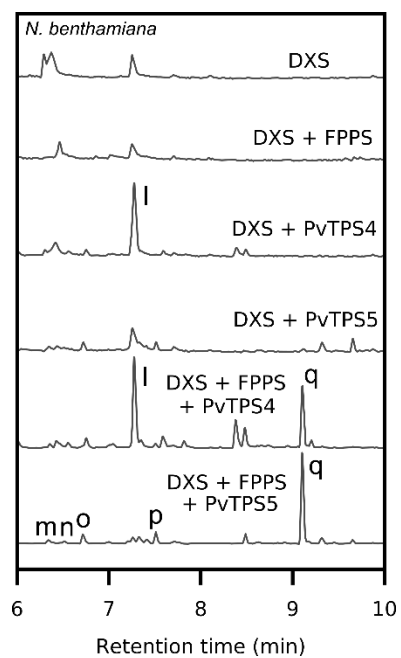

**Fig. S6. NMR spectra of PvHVS major product from GGPP, identified as 11-hydroxy vulgarisane.**

$^1\text{H}$  NMR (500 MHz,  $\text{cdcl}_3$ )  $\delta$  0.87 (s, 3H, H-16), 0.89 (d,  $J = 6.6$  Hz, 3H, H-20), 0.95 (d,  $J = 6.7$  Hz, 3H, H-15), 0.96 (d,  $J = 6.5$  Hz, 3H, H-19), 1.02 (d,  $J = 1.2$  Hz, 1H, OH-11), 1.07 (s, 3H, H-17), 1.17 (ddd,  $J = 13.6, 4.1, 2.8$  Hz, 1H, H-8a), 1.30 (m, 1H, H-4a), 1.31 (m, 1H, H-12a), 1.35 (m, 1H, H-13a), 1.44 (m, 2H, H-5a, H-12b), 1.46 (m, H-14), 1.53 (d,  $J = 27.4$  Hz, 1H, H-8b), 1.58 (m, 2H, 9a, H-13b), 1.65 (m, 2H, H-5b, H-18), 1.67 (m, 1H, H-4b), 1.70 (d,  $J = 6.4$  Hz, 1H, H-1), 1.81 (m, 2H, H-3, H-9b), 2.20 (t,  $J = 8.0$  Hz, 1H, H-6), 2.38 (q,  $J = 6.9$  Hz, 1H, H-2).

$^{13}\text{C}$  NMR (126 MHz,  $\text{cdcl}_3$ )  $\delta$  14.33 (C-15), 21.14 (C-17), 22.76 (C-20), 23.51 (C-16), 23.97 (C-19), 27.03 (C-5), 27.33 (C-13), 28.17 (C-18), 32.69 (C-8), 34.02 (C-4), 35.04 (C-9), 35.06 (C-7), 36.67 (C-3), 41.19 (C-2), 42.02 (C-12), 44.18 (C-6), 44.81 (C-10), 46.19 (C-1), 55.88 (C-14), 81.60 (C-11).

# <sup>1</sup>H-NMR

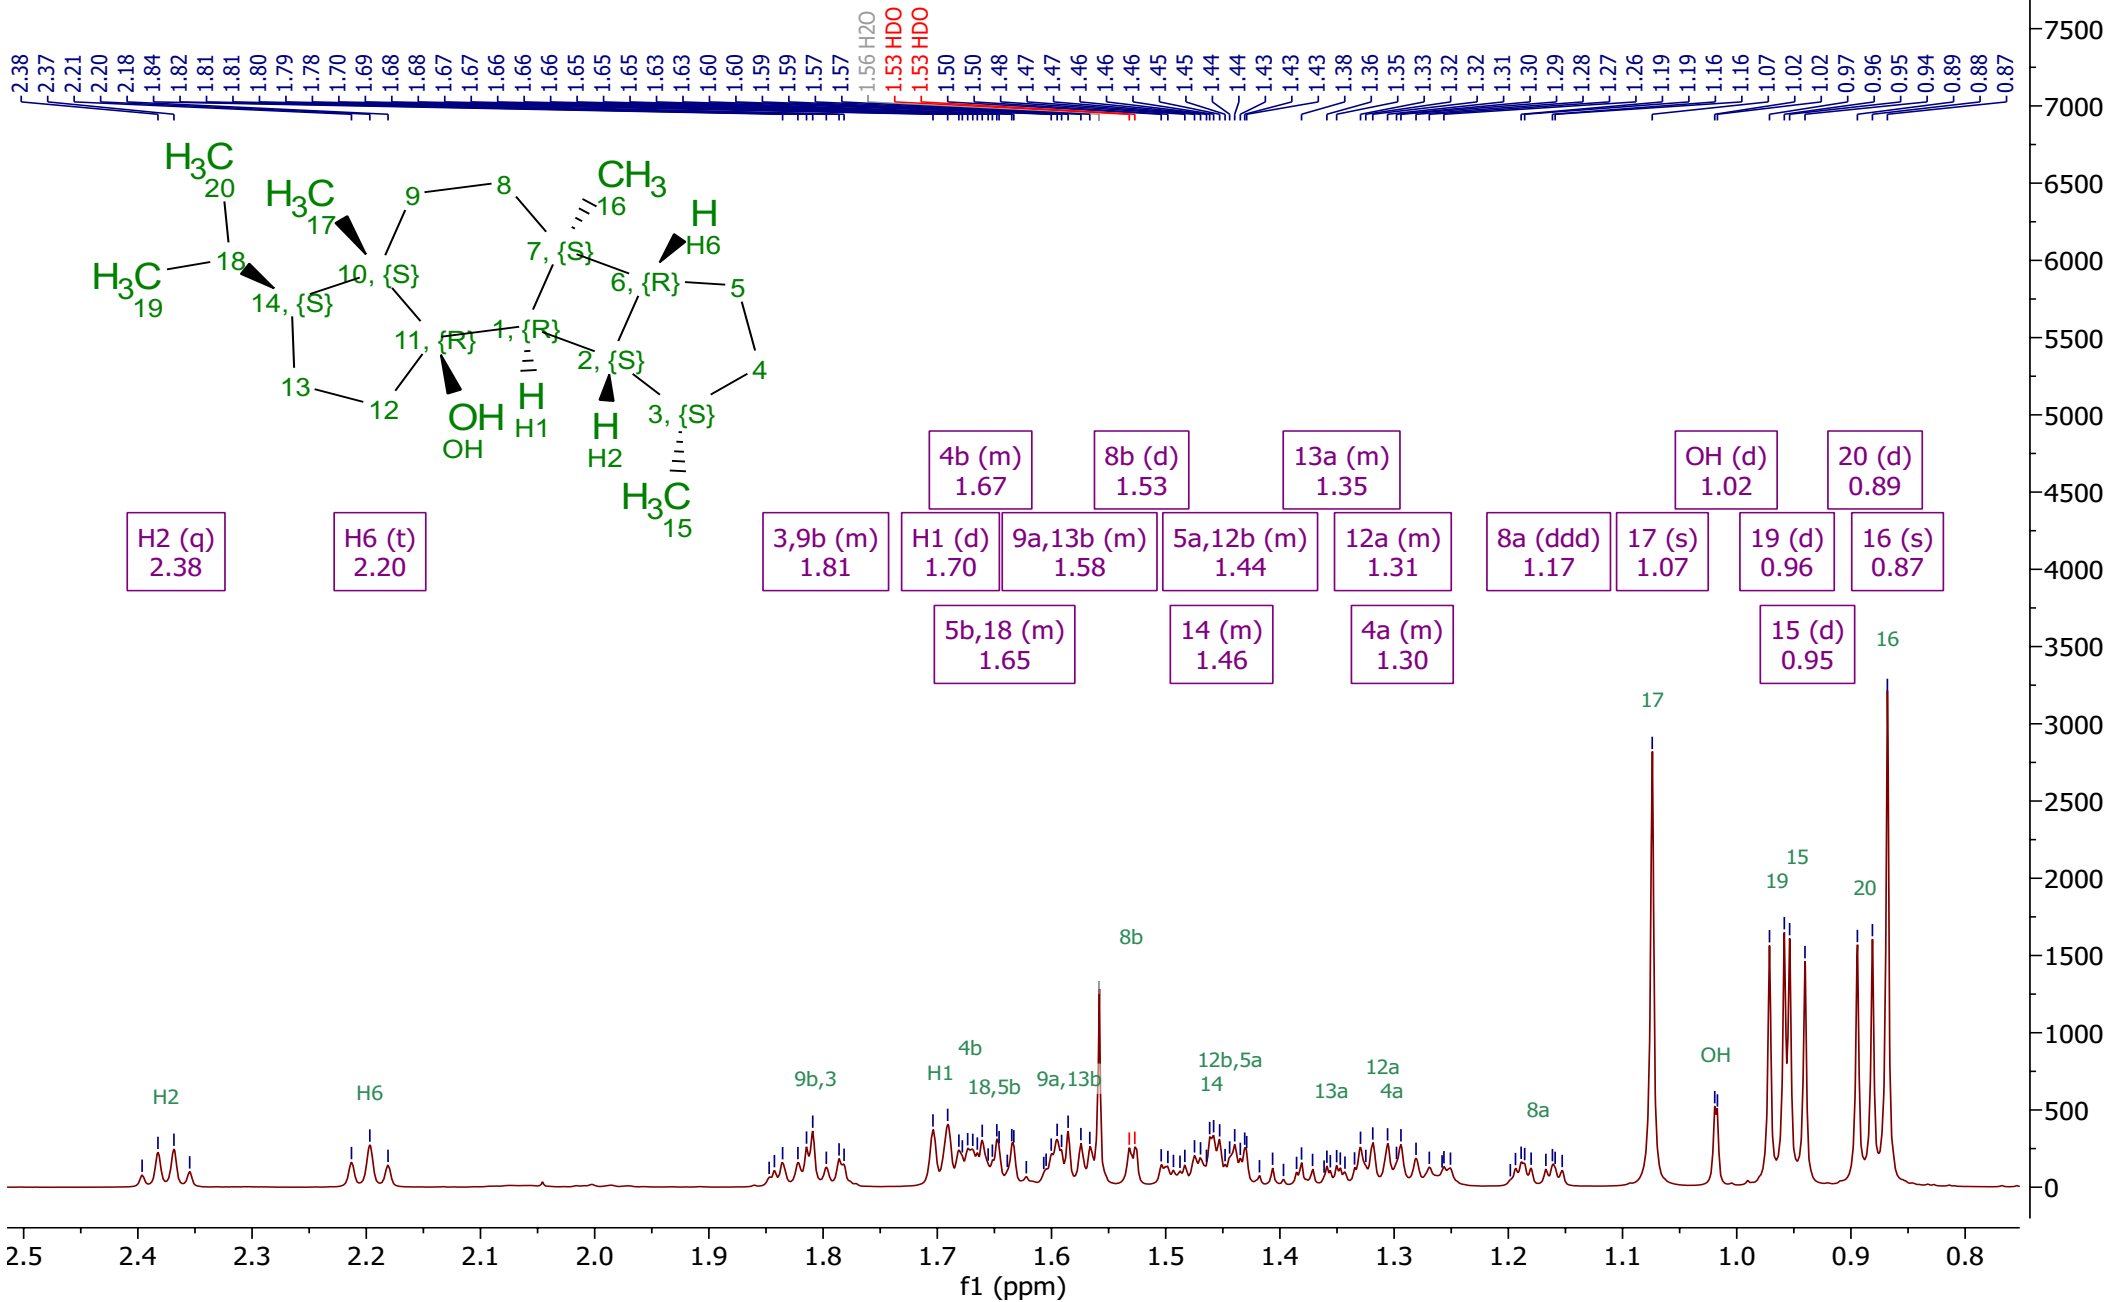

# $^{13}\text{C}$ -NMR

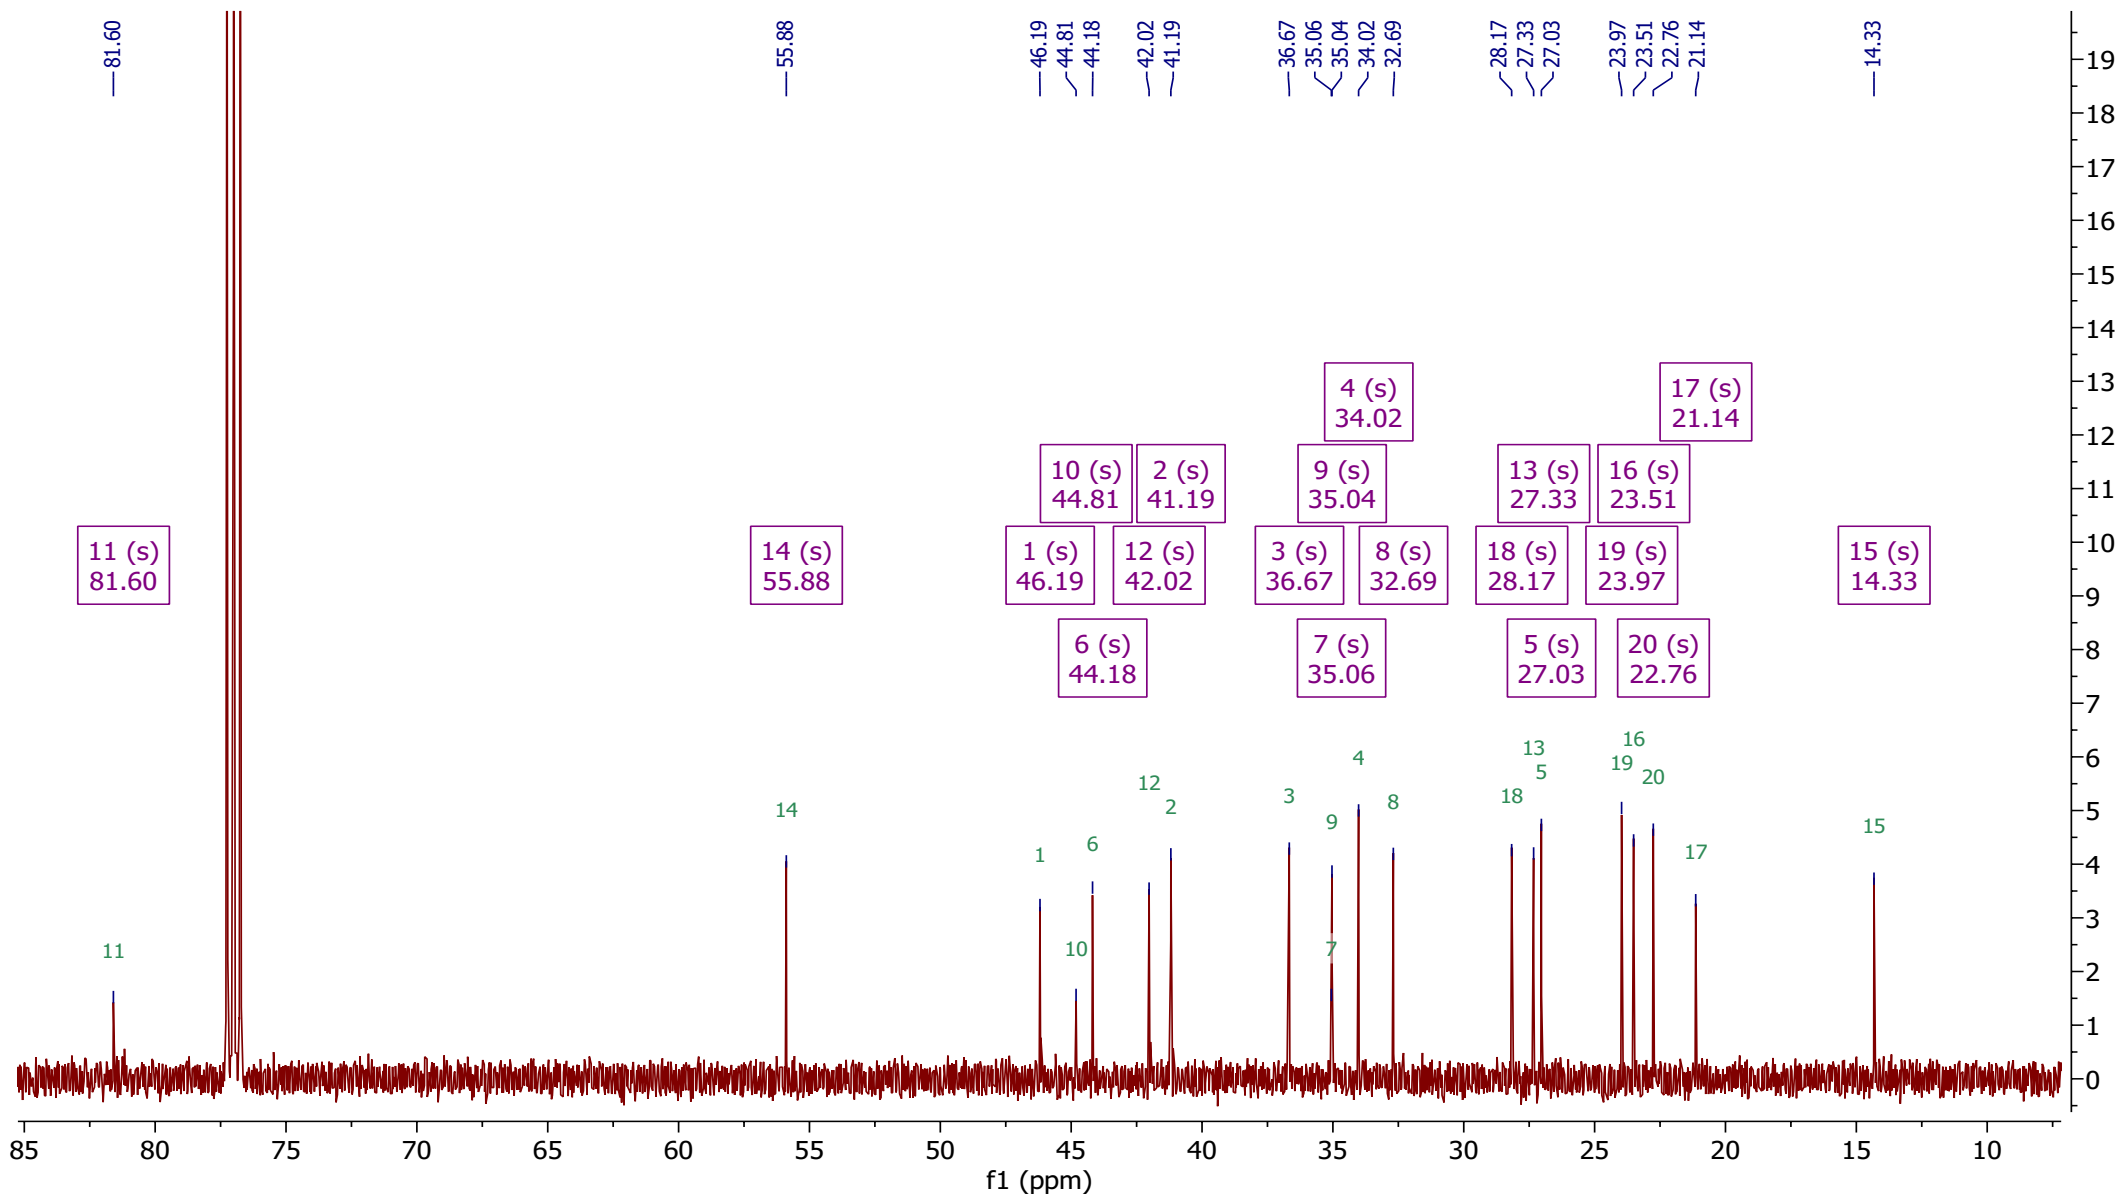

# COSY

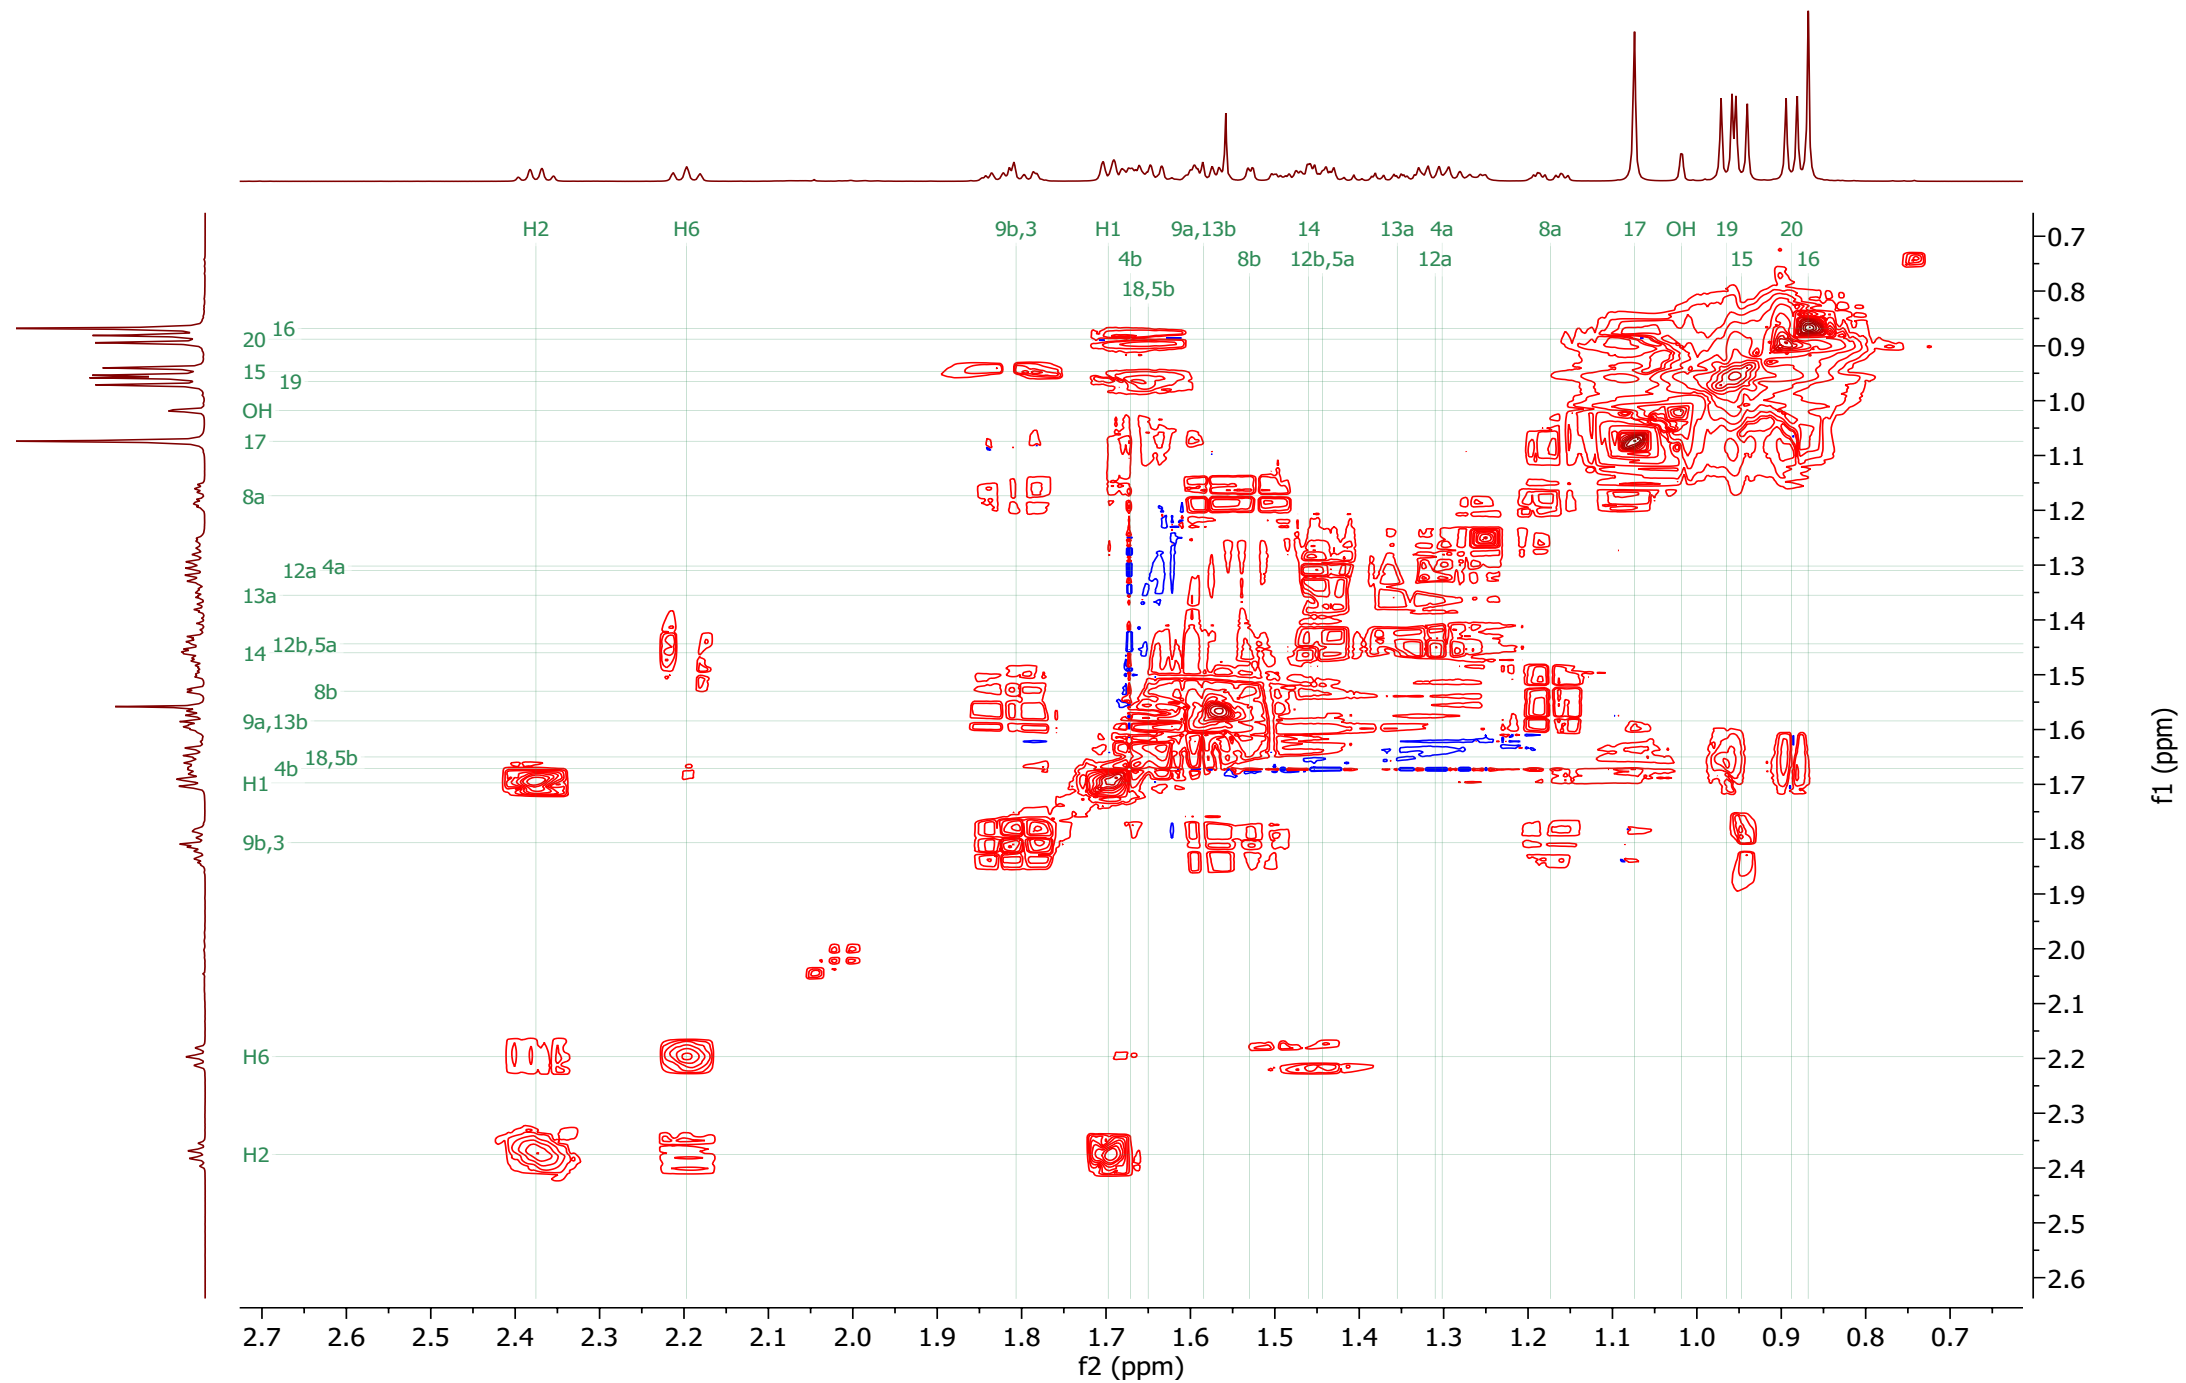

# HSQC

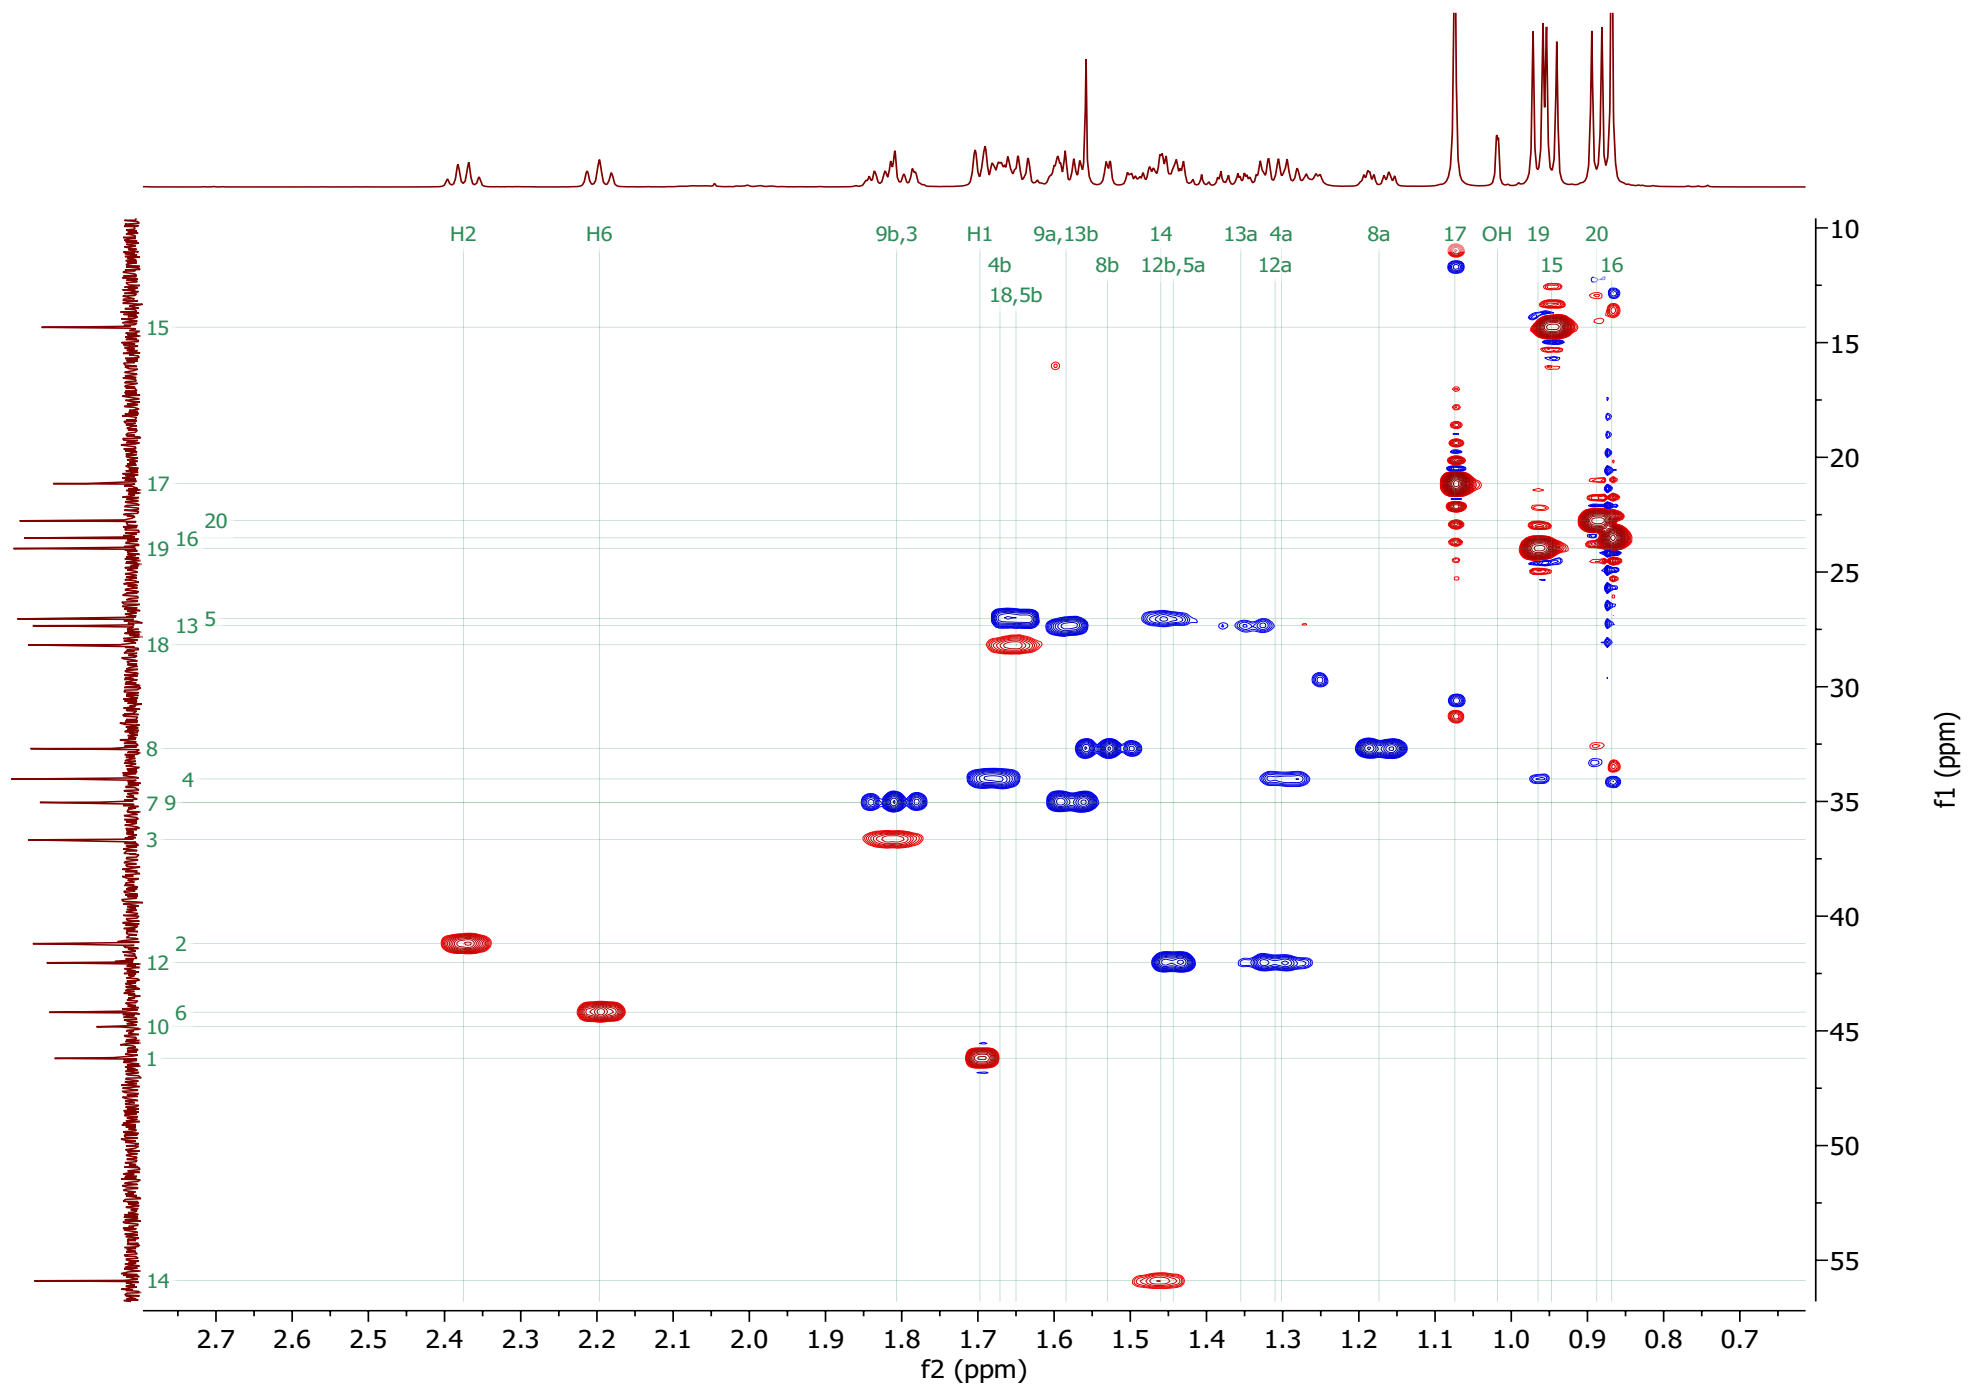



# HMBC

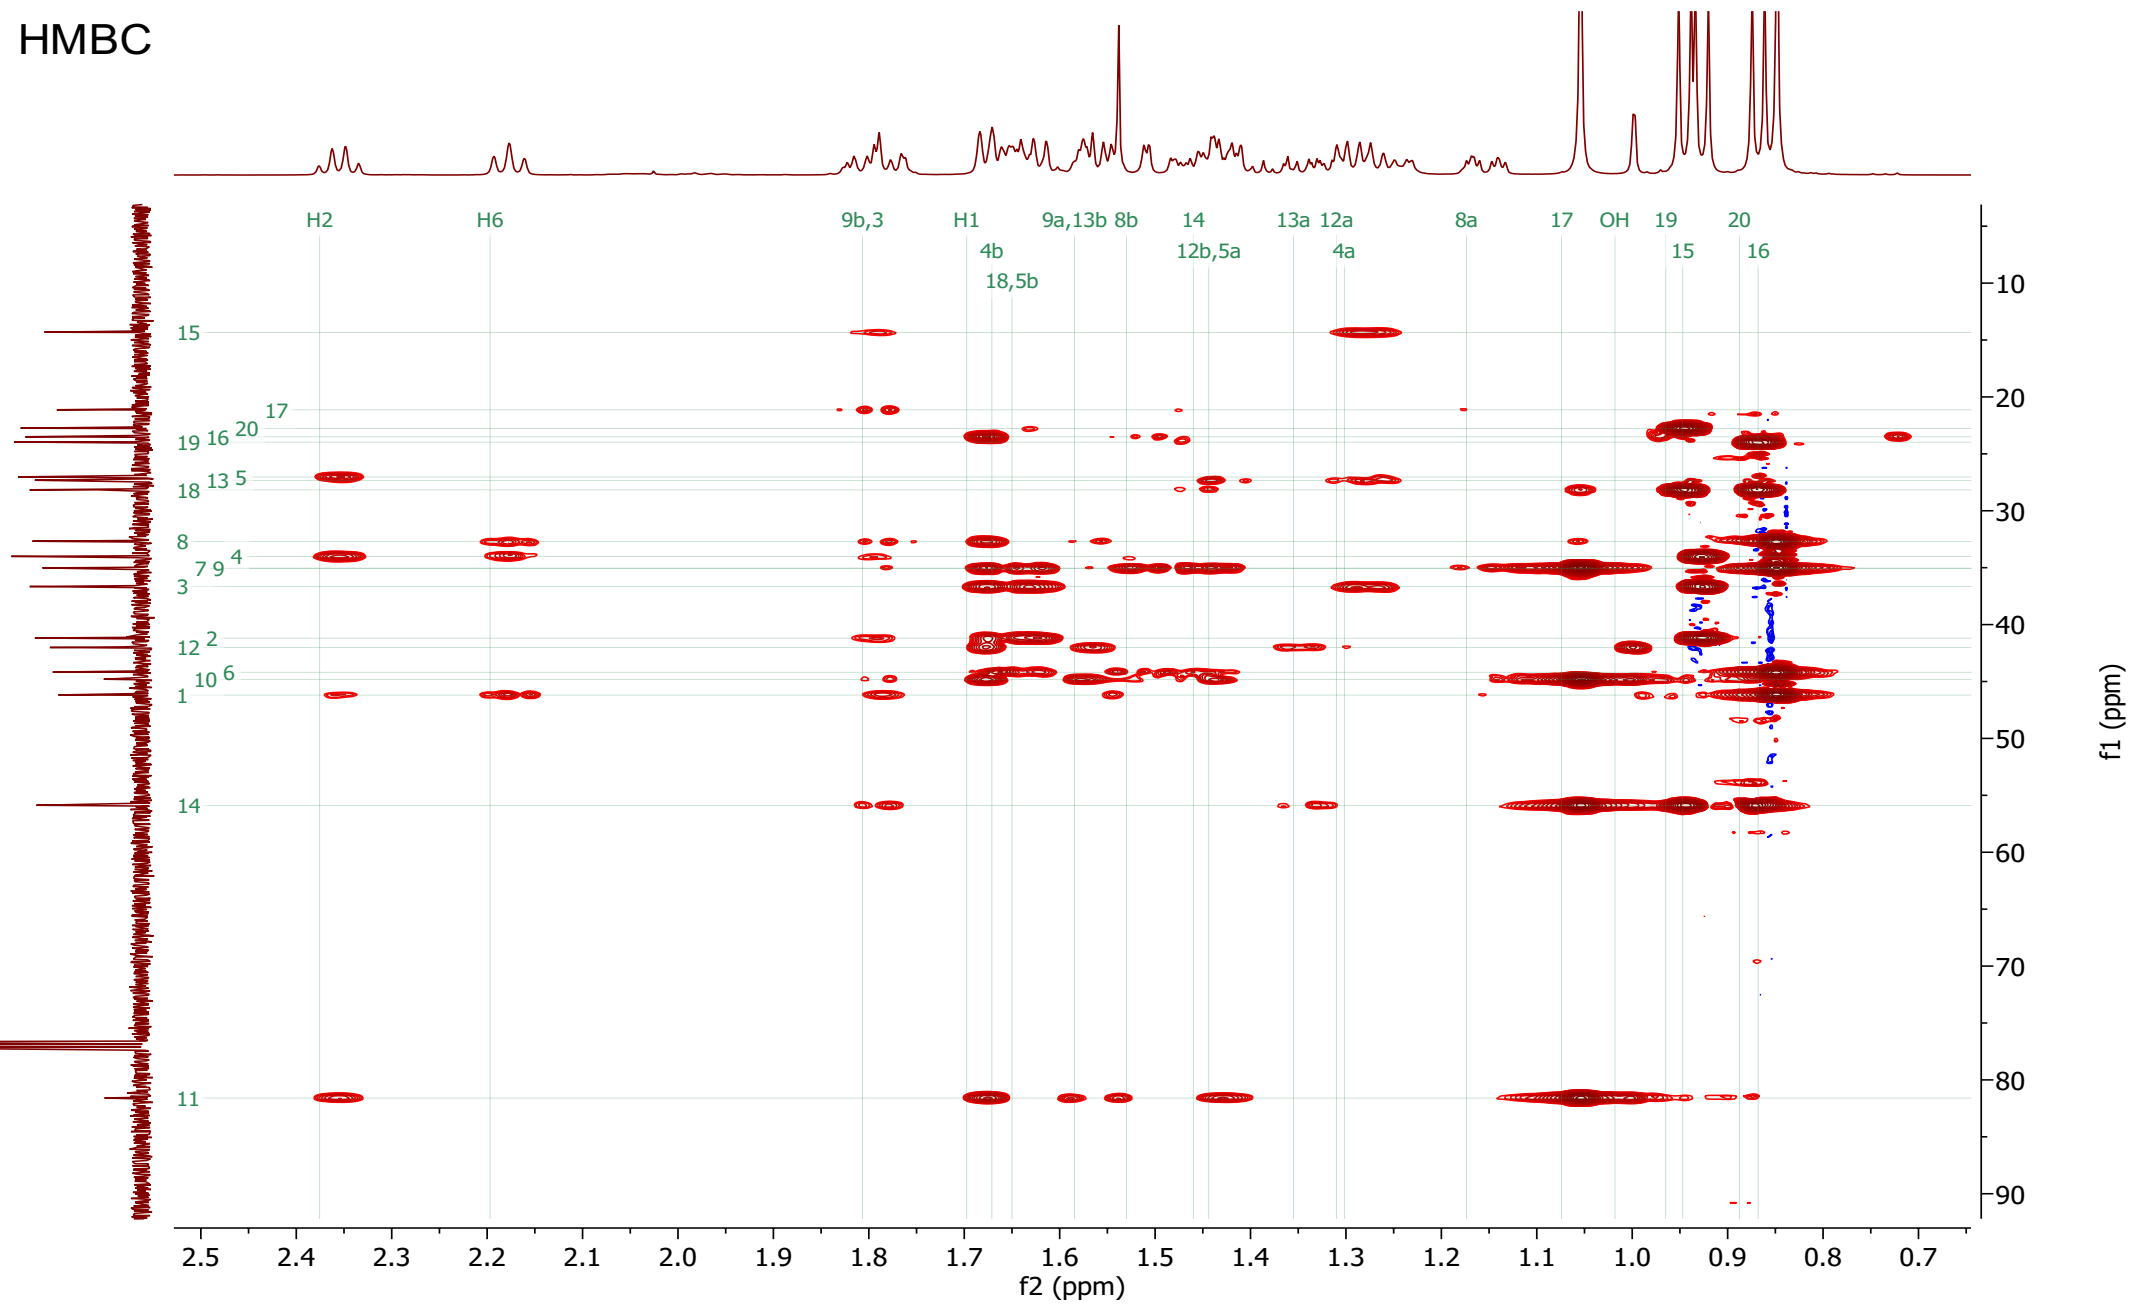

# NOESY

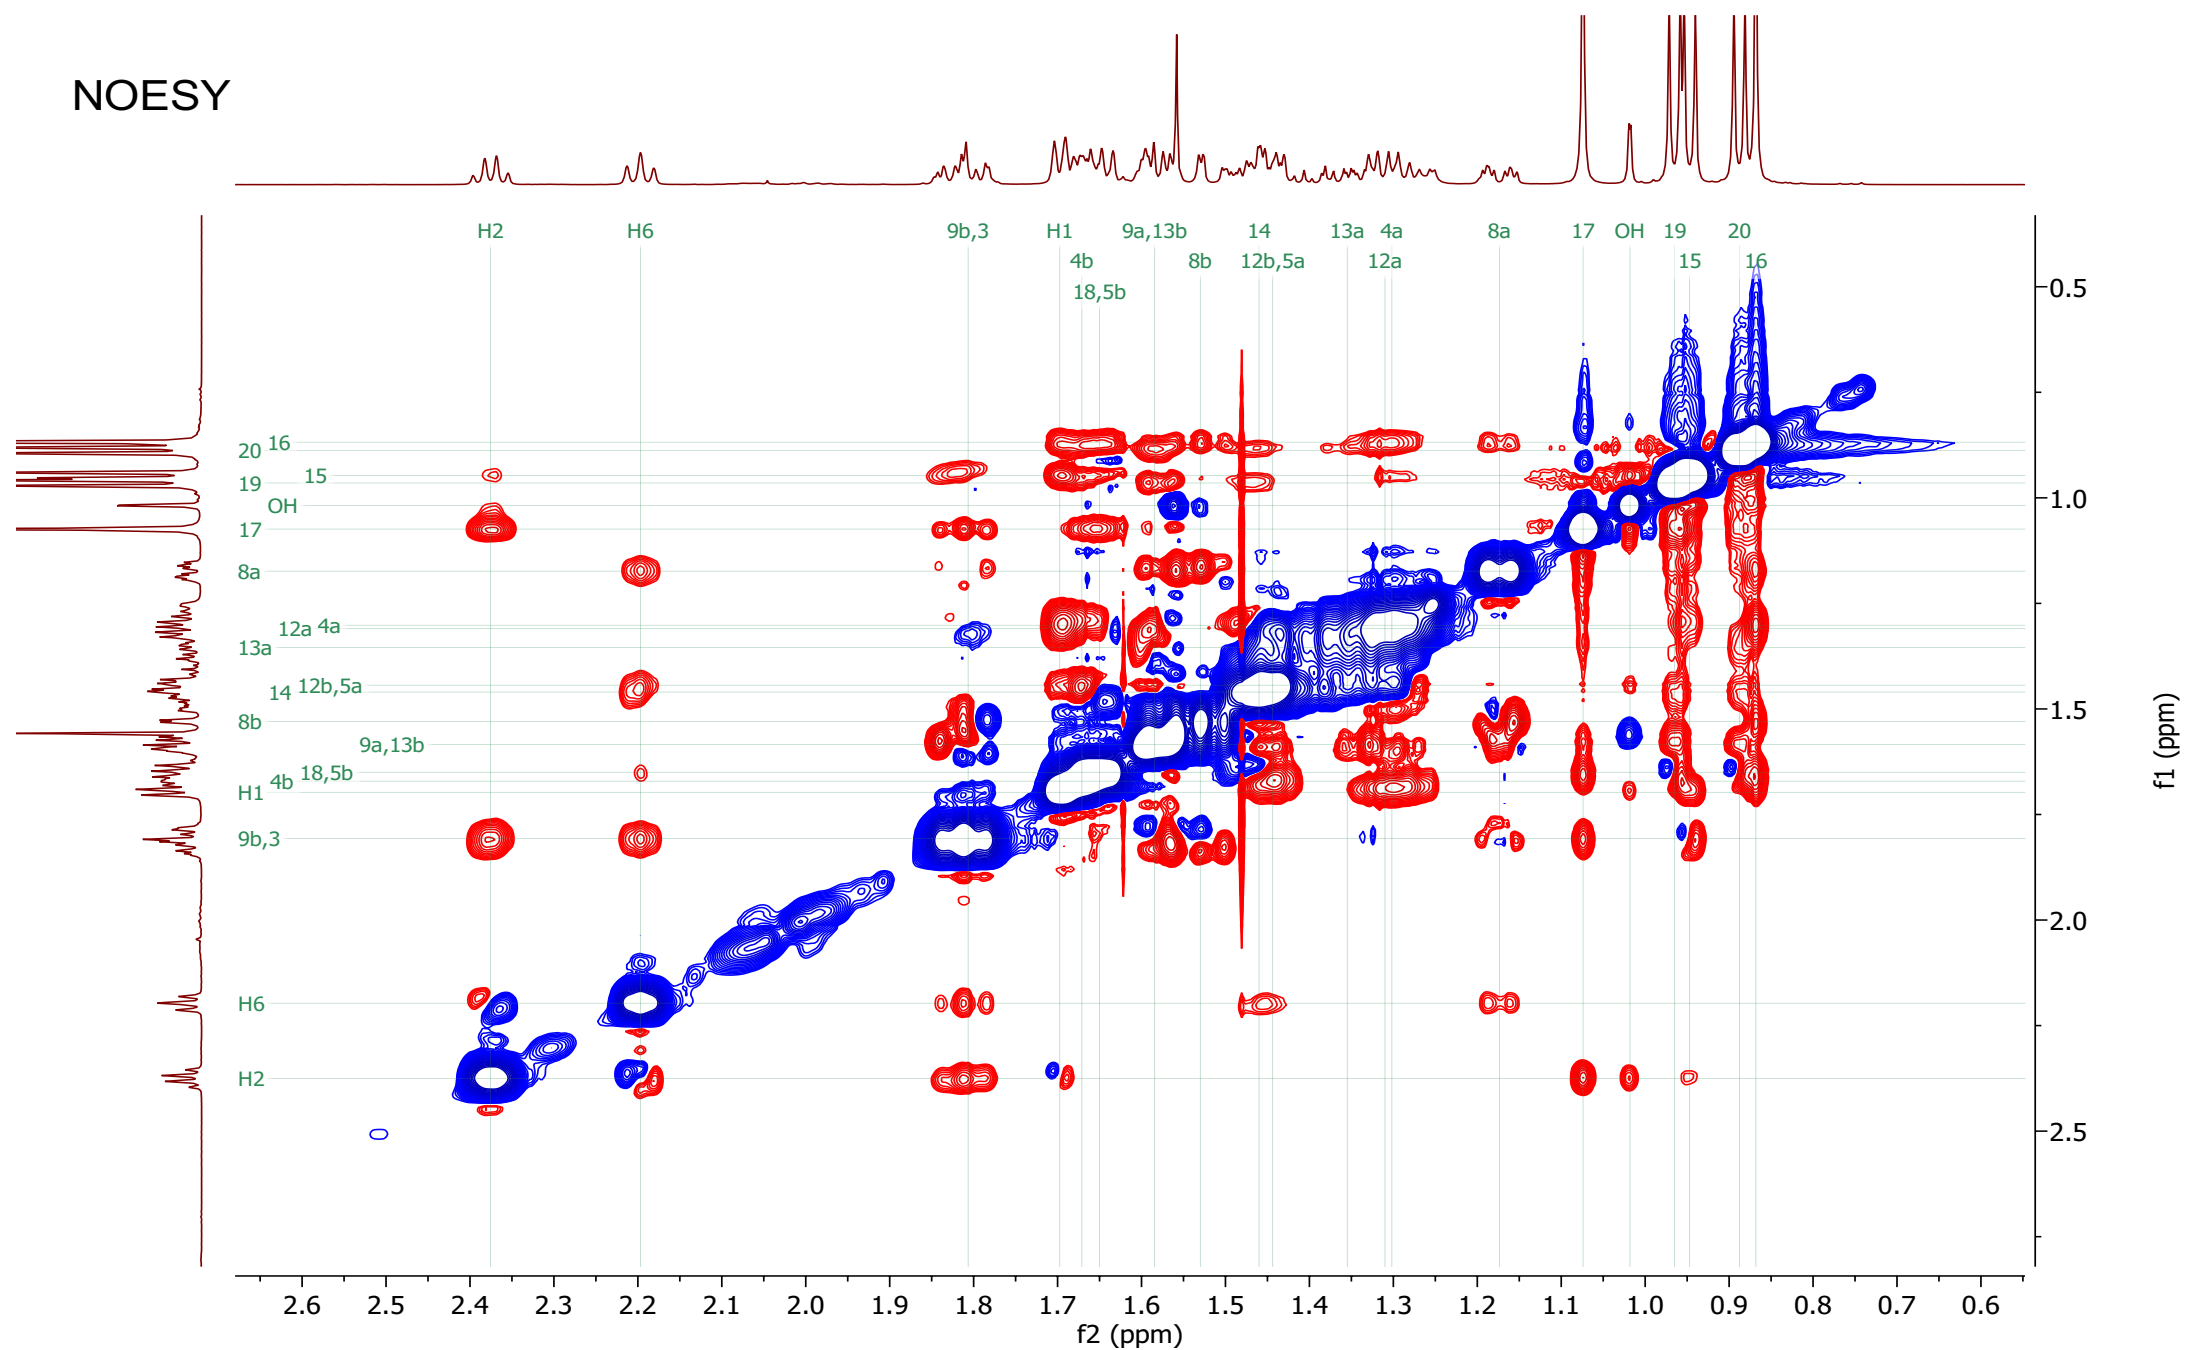

**Fig. S7. 11-Hydroxyvulgarisane (z) in *P. vulgaris*.** A 70% methanol extract of root tissue was subjected to non-targeted UHPLC/MS<sup>E</sup> analysis using a 31-min chromatographic separation. (a) Extracted ion chromatogram for  $m/z$  273.3 ( $[M+H-H_2O]^+$ ) for the crude *P. vulgaris* extract and (b) extracted ion chromatogram for  $m/z$  273.3 for the purified 11-hydroxy vulgarisane, (c) MS/MS spectrum of the purified 11-hydroxyvulgarisane. The identity of purified 11-hydroxyvulgarisane was confirmed by NMR.

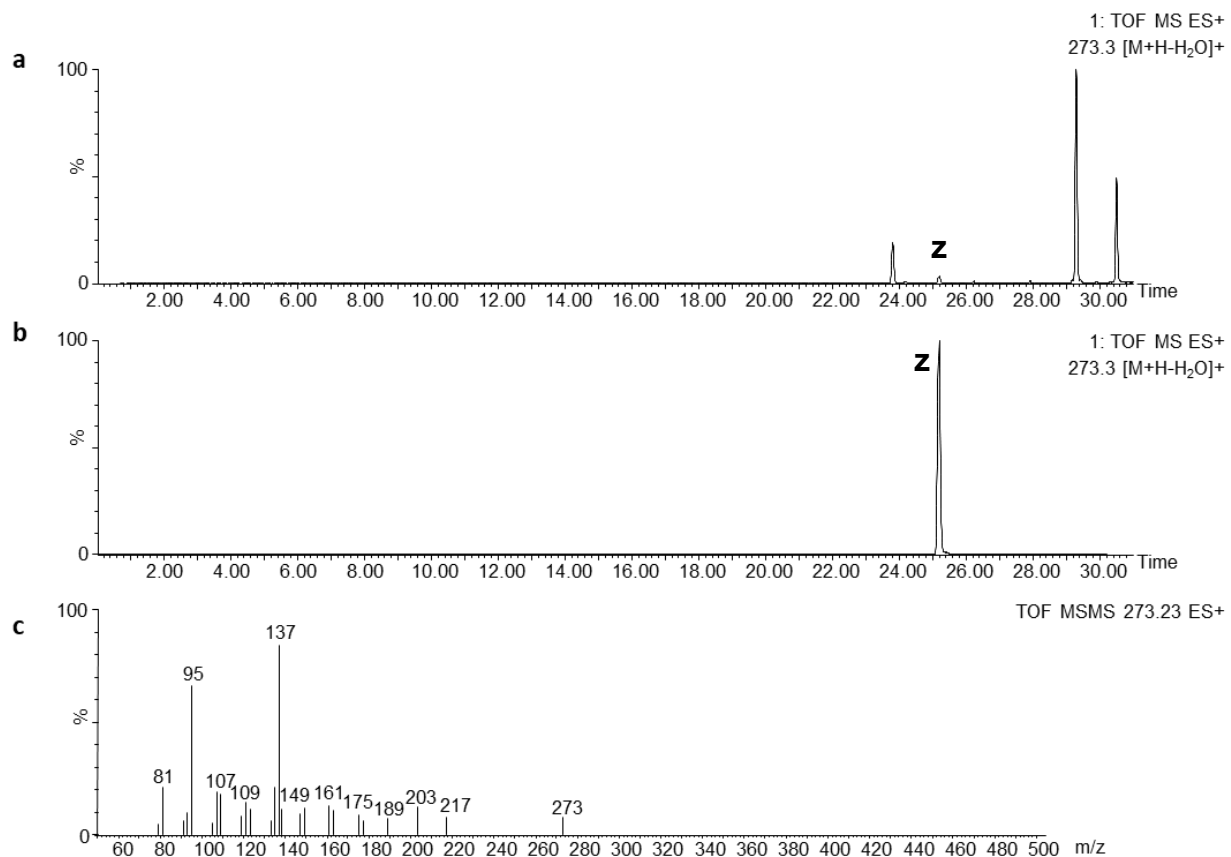

**Table S2. Exact masses and relative abundance for ions of vulgarisin-related compounds detected by UHPLC/MS<sup>E</sup> in *P. vulgaris* root extracts.**

| <b>Annotated Metabolite</b>                  | <b>Formula</b>                                 | <b>Retention time [min]</b> | <b>Calculated m/z</b>                           | <b>Experimental m/z</b>                         | <b>Precursor and fragment ion(s) m/z and relative ion abundances (%)</b>                    |
|----------------------------------------------|------------------------------------------------|-----------------------------|-------------------------------------------------|-------------------------------------------------|---------------------------------------------------------------------------------------------|
| 11-Hydroxy vulgarisane<br>(Fig. S7 c)        | C <sub>20</sub> H <sub>34</sub> O              | 25.19                       | 273.2582<br>[M+H-H <sub>2</sub> O] <sup>+</sup> | 273.2585<br>[M+H-H <sub>2</sub> O] <sup>+</sup> | 273.26 (10), 217.20 (10), 203.18 (15), 189.16 (9),<br>137.13 (100), 107.08 (24), 95.08 (85) |
| Vulgarisin A isomer 1<br>(Fig. S8 b, top)    | C <sub>28</sub> H <sub>46</sub> O <sub>6</sub> | 17.17                       | 501.3192<br>[M+Na] <sup>+</sup>                 | 501.3191<br>[M+Na] <sup>+</sup>                 | 501.32 (15), 461.33 (100), 373.27 (51),<br>285.22 (74), 267.21 (21)                         |
| Vulgarisin A isomer 2<br>(Fig. S8 b, bottom) | C <sub>28</sub> H <sub>46</sub> O <sub>6</sub> | 19.88                       | 501.3192<br>[M+Na] <sup>+</sup>                 | 501.3184<br>[M+Na] <sup>+</sup>                 | 501.32 (34), 461.33 (100), 373.27 (33),<br>285.22 (58), 267.21 (20)                         |

**Fig. S8. Vulgarisin A and D isomers in *P. vulgaris*.** A 70% methanol extract of root tissue was subjected to non-targeted UHPLC/MS<sup>E</sup> analysis using a 31-min chromatographic separation and electrospray ionization in positive-ion mode. (a) Extracted ion chromatogram for  $m/z$  501.3 ( $[M+Na]^+$ ) of the *P. vulgaris* extract is shown in function 1 (b). The mass spectra of the two peaks are shown, displaying prominent  $[M+H-H_2O]^+$  ions in each case at  $m/z$  461 and subsequent loss of isobutyric acid (88 Da) at  $m/z$  373. Note that the mass spectra of the two isomers are consistent with the previously reported spectra for vulgarisin A (Lou *et al.*, 2014) and vulgarisin D (Lou *et al.*, 2017).

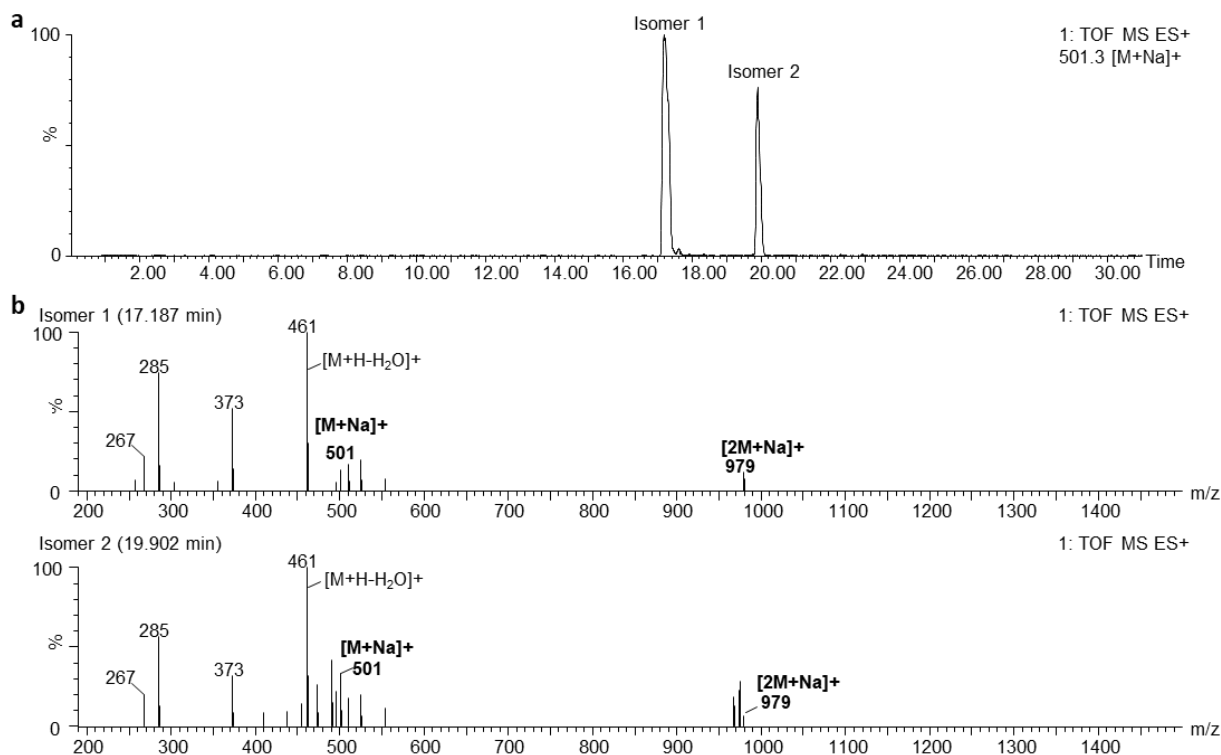

### **Additional references:**

**Fu S, Ma Y, Yao H, Xu Z, Chen S, Song J, Au KF, Berger B. 2018.** IDP-denovo: de novo transcriptome assembly and isoform annotation by hybrid sequencing. *Bioinformatics* **34**: 2168–2176.

**Hamberger B, Ohnishi T, Hamberger B, Séguin A, Bohlmann J. 2011.** Evolution of diterpene metabolism: Sitka spruce CYP720B4 catalyzes multiple oxidations in resin acid biosynthesis of conifer defense against insects. *Plant Physiology* **157**: 1677–1695.

**Hoang NV, Furtado A, Mason PJ, Marquardt A, Kasirajan L, Thirugnanasambandam PP, Botha FC, Henry RJ. 2017.** A survey of the complex transcriptome from the highly polyploid sugarcane genome using full-length isoform sequencing and de novo assembly from short read sequencing. *BMC Genomics* **18**.

**Lou H-Y, Jin L, Huang T, Wang D-P, Liang G-Y, Pan W-D. 2017.** Vulgarisins B–D, three novel diterpenoids with a rare skeleton isolated from *Prunella vulgaris* Linn. *Tetrahedron Letters* **58**: 401–404.

**Lou H, Zheng S, Li T, Zhang J, Fei Y, Hao X, Liang G, Pan W. 2014.** Vulgarisin A, a new diterpenoid with a rare 5/6/4/5 ring skeleton from the Chinese medicinal plant *Prunella vulgaris*. *Organic Letters* **16**: 2696–2699.

**Salmela L, Rivals E. 2014.** LoRDEC: accurate and efficient long read error correction. *Bioinformatics* **30**: 3506–3514.
